# Supplementary material for: Anticancer Activity of the Goat Antimicrobial Peptide ChMAP-28
Source: Front Pharmacol. 2018 Dec 21;9:1501. doi: 10.3389/fphar.2018.01501 (PMC6308165; doi:10.3389/fphar.2018.01501)
Supplement: Supplementary file 5 [file Table_1.xlsx]

## Sheet: PAS
Pathway	Database	Norm_1_I	Norm_1_II	Norm_27_I	Norm_28_I	Norm_29_I	Norm_2_I	Norm_56_II	ChMAP-28_1.25 µM	ChMAP-28_2.5 µM	ChMAP-28_5 µM
AHR_Pathway	primary_new	-0.660864	1.33692	3.55688	-1.43339	2.47073	-5.43294	0.162669	-1.17852	1.5625	-0.661929
AHR_Pathway_C-myc_expression_via_RELA	primary_new	0.967032	1.25621	2.66498	-2.25523	0.164534	-2.26973	-0.527796	-0.769759	1.01999	0.466675
AHR_Pathway_Cath_D_expression_via_SP1	primary_new	1.09719	1.17707	2.744	-2.5266	0.507746	-2.62114	-0.378259	-1.13755	1.33796	0.506773
AHR_Pathway_CYP1A1_CYP1B1_CYP1A2_AHRR_gene_expression_via_POLR2B	primary_new	-2.34413	0.316454	0.11784	1.97943	1.13843	-1.80671	0.59868	0.199021	0.0141771	-0.650646
AHR_Pathway_PS2_Gene_expression_via_ESR1	primary_new	0.846597	1.03454	2.68731	-2.18679	0.759123	-2.34816	-0.792623	-0.896127	1.10127	0.366337
Akt_Signaling_Pathway	primary_new	-12.362	13.9748	-14.7729	14.0898	-27.5565	-5.20853	31.8352	5.28363	15.4815	23.1506
Akt_Signaling_Pathway_Acetylation_of_proteins	primary_new	-0.533378	-3.37771	-1.08518	1.05757	-1.15917	2.98212	2.11576	-0.0662652	2.52236	-0.592823
Akt_Signaling_Pathway_Aggregation_and_Neurodegeneration	primary_new	0.631382	-3.98846	-0.586392	1.54105	-0.933979	-0.0597858	3.39619	0.826604	2.52368	1.27064
Akt_Signaling_Pathway_Apoptosis	primary_new	-0.532355	-3.84246	0.151232	0.820936	-0.529853	2.36812	1.56438	1.18635	3.31281	-0.583051
Akt_Signaling_Pathway_AR_mediated_apoptosis	primary_new	-0.206916	-3.75477	-0.495124	1.34248	-1.70058	3.00075	1.81416	1.04935	2.70345	-0.165542
Akt_Signaling_Pathway_Blocks_Apoptosis	primary_new	-0.499226	-3.89626	-0.384923	0.854368	0.171796	2.24666	1.50759	1.28624	3.47416	-1.39864
Akt_Signaling_Pathway_Blood_cell_differentiation	primary_new	-0.641704	-2.26243	-1.05809	0.805701	-1.78702	2.64172	2.30183	0.866442	2.78348	0.5505
Akt_Signaling_Pathway_Cell_Cycle	primary_new	0.359882	-0.58585	0.00659961	-0.893164	0.436583	1.46206	-0.786112	-0.545597	-0.270805	-0.793098
Akt_Signaling_Pathway_Cell_Cycle_Progression	primary_new	0.00290041	-3.81594	-0.0382539	-0.15572	-0.815343	2.02955	2.79281	1.13328	3.7165	-0.245425
Akt_Signaling_Pathway_Cell_Survival	primary_new	3.76509	-9.86286	-1.56873	-0.358062	3.16344	5.38732	-0.526193	0.329247	4.9334	-4.50712
Akt_Signaling_Pathway_Elevation_of_Glucose_Import	primary_new	-0.588469	-3.89283	-0.0229749	1.17901	-0.619833	2.68775	1.25734	0.87683	3.35823	-0.661061
Akt_Signaling_Pathway_Enhancement_of_Breast_Epithelial	primary_new	-0.697118	-2.77822	-1.24541	1.08402	-1.27285	2.33825	2.57133	0.879156	3.0905	0.149031
Akt_Signaling_Pathway_ERK_mediated_apoptosis	primary_new	-0.568769	-2.20494	-0.17598	0.568205	-1.40592	1.95044	1.83696	0.733964	2.84977	0.0120698
Akt_Signaling_Pathway_Genetic_Stability	primary_new	-0.32968	-3.38252	-1.59072	0.971224	-0.939428	2.91057	2.36055	0.680941	2.55507	0.240319
Akt_Signaling_Pathway_Glucose_Uptake	primary_new	-0.00546065	0.173684	-1.19613	-1.04089	-0.249333	1.49983	0.818306	0.925339	0.824458	0.438817
Akt_Signaling_Pathway_Glycogen_Synthesis_and_Apoptosis	primary_new	-0.363154	-3.87434	0.0359675	-0.175945	-0.224867	3.05237	1.54996	0.394577	2.46896	-1.09877
Akt_Signaling_Pathway_Increased_GLUT4_translocation	primary_new	-1.17146	-3.04743	-0.459313	0.941681	-1.74032	3.04855	2.4283	1.10217	3.11178	-0.113855
Akt_Signaling_Pathway_Induction_of_Chromatin_Condensation	primary_new	-0.675873	-4.00188	0.93266	0.707087	-1.22165	2.22245	2.03721	0.838314	3.68169	-0.470094
Akt_Signaling_Pathway_JNK_mediated_apoptosis	primary_new	-0.45449	-3.24507	-1.14489	1.08356	-0.279518	2.46125	1.57916	0.987295	3.41735	-0.680459
Akt_Signaling_Pathway_Neuroprotection	primary_new	0.811571	-6.15546	-1.13362	1.59151	0.472288	3.37258	1.04113	0.944633	2.38557	-1.25182
Akt_Signaling_Pathway_NF-kB_dependent_transciption	primary_new	-0.487616	-3.10888	-1.38421	1.13989	-1.68051	2.84039	2.68095	0.0662299	2.67676	-0.381381
Akt_Signaling_Pathway_NF-kB_pathway	primary_new	0.146707	-3.70077	-1.03809	0.106802	-1.43249	3.35163	2.56622	-0.661769	2.94229	0.555298
Akt_Signaling_Pathway_NFAT_degradation	primary_new	-2.5222	-0.312125	0.345052	2.95565	-2.96031	1.8033	0.690633	1.05828	1.50141	-0.923697
Akt_Signaling_Pathway_NO_production	primary_new	-1.42957	-2.78422	-1.03968	1.22115	-0.824626	2.08505	2.7719	0.589447	2.42691	-0.07791
Akt_Signaling_Pathway_p73_mediated_apoptosis	primary_new	-1.21505	-2.51453	-0.950051	1.65462	-2.66693	2.56999	3.12195	0.280792	2.41756	1.68025
Akt_Signaling_Pathway_Promotes_Adipogenesis	primary_new	0.456623	-3.58712	-0.923546	0.254789	-1.19382	2.86352	2.12956	0.588892	2.42812	-0.483164
Akt_Signaling_Pathway_Protein_Synthesis	primary_new	-0.89107	-2.59392	-0.871881	0.628854	-0.806787	2.50418	2.03063	-0.349282	2.60051	-0.166104
Akt_Signaling_Pathway_Proto-Oncogenic_and_RTK-signaling	primary_new	-0.543237	-3.64238	-0.307055	0.216135	-0.803556	2.68353	2.39656	0.438972	2.64384	-0.719798
Akt_Signaling_Pathway_Regulation_of_Cyclic_Nucleotide	primary_new	-0.0683947	-3.03868	-1.62957	0.622066	-0.53937	2.27279	2.38116	0.534678	3.00494	-0.453563
Akt_Signaling_Pathway_Regulation_of_Na+_Transport	primary_new	-0.190715	-0.651865	-0.621028	-0.134419	1.50114	0.762199	-0.665307	0.40005	-0.0850743	-1.23281
Akt_Signaling_Pathway_Splicing_Regulation	primary_new	-0.731411	-0.215822	-1.79038	1.38971	-0.926371	1.71481	0.559453	0.0701894	-0.142802	0.188912
Akt_Signaling_Pathway_Survival_Genes	primary_new	0.142586	-4.18212	-1.99643	1.77179	-2.03964	3.63547	2.66835	0.0186412	2.95949	-0.443837
Akt_Signaling_Pathway_Synaptic_Transmission	primary_new	-2.21608	0.388235	-4.91122	3.75201	-3.18959	0.940044	5.2366	-0.0172053	1.71082	2.80508
Akt_Signaling_Pathway_Translation	primary_new	-1.01562	-1.53149	0.19481	0.360032	2.17279	0.667088	-0.847618	-0.426571	1.27134	-2.16428
Akt_Signaling_Pathway_Tumor_Supression	primary_new	-0.893743	-2.61939	0.256645	0.710676	-1.14761	1.71593	1.9775	0.902504	2.81012	0.0672605
ATM_Pathway	primary_new	1.47526	2.63195	-2.38062	-2.00426	-5.03135	2.85996	2.44907	0.383326	-0.283856	1.42649
ATM_Pathway_Apoptosis	primary_new	-0.342443	0.364979	-0.437538	-0.258439	-0.244045	0.572586	0.344901	-0.468562	-0.335514	-0.148093
ATM_Pathway_Apoptosis_and_Senescence	primary_new	0.77868	-0.335621	-0.167036	-1.98416	1.46767	0.233547	0.00691542	-0.0421959	0.0153248	-0.550612
ATM_Pathway_Cell_Cycle_Checkpoint_Control	primary_new	0.361855	-0.341733	-0.674955	-0.188668	0.263311	0.862797	-0.282607	0.158228	-0.225217	-0.369
ATM_Pathway_Cell_Survival	primary_new	-1.57847	2.59848	-1.24409	-0.877246	-2.88923	0.461454	3.5291	0.0593589	0.900433	2.67356
ATM_Pathway_Checkpoint_Activation	primary_new	-0.0861838	-0.196879	-0.248399	-0.430268	0.0530263	0.646973	0.261731	-0.247399	0.251197	-0.470061
ATM_Pathway_DNA_repair	primary_new	0.597562	-0.755025	-1.63135	-0.397012	1.00511	1.38987	-0.209152	-0.270385	0.193651	-0.61048
ATM_Pathway_G2-Mitosis_progression	primary_new	0.202091	0.291254	-1.21025	-1.63205	1.07929	0.305346	0.964321	0.0495439	0.256455	-0.937939
ATM_Pathway_G2_M_Checkpoint_Arrest	primary_new	0.202091	0.291254	-1.21025	-1.63205	1.07929	0.305346	0.964321	0.0495439	0.256455	-0.937939
ATM_Pathway_NF-kB_Pathway	primary_new	-0.0424534	-0.631904	0.153267	-0.246738	-0.0932737	0.912936	-0.0518333	-0.430831	0.0520633	-1.21527
ATM_Pathway_Repair_and_Recombination	primary_new	0.214691	0.201696	-0.0410319	-0.00596389	-1.97018	1.1074	0.493396	-0.427467	-0.971655	-0.0840219
ATM_Pathway_S-phase_arrest	primary_new	-0.0861838	-0.196879	-0.248399	-0.430268	0.0530263	0.646973	0.261731	-0.247399	0.251197	-0.470061
ATM_Pathway_S-phase_progression	primary_new	1.01358	0.134353	-0.906097	-1.71073	-0.537036	2.37254	-0.366601	-0.603007	1.03239	-1.13881
ATM_Pathway_Synaptic_Vesicle_Transport	primary_new	-0.0861838	-0.196879	-0.248399	-0.430268	0.0530263	0.646973	0.261731	-0.247399	0.251197	-0.470061
BRCA1_Pathway	primary_new	2.24439	-1.33585	3.99825	-8.32431	-4.19856	5.29843	2.31766	0.176727	-3.05225	2.16835
BRCA1_Pathway_Base_Excission_Repair	primary_new	0.749001	-1.36138	-1.02151	-0.831806	2.17813	0.732674	-0.445113	-0.0934442	-0.0865219	-0.616843
BRCA1_Pathway_Cell_Cycle_Arrest_DNA_Repair_Genes_p21_WAF_CIP1_14-3-3_GADD45	primary_new	1.69425	-0.901886	-1.29275	-1.78446	0.877922	1.59624	-0.189321	-0.254189	-0.109314	-0.424826
BRCA1_Pathway_Chromatin_Remodeling	primary_new	4.33011	-1.22661	3.91246	-10.8203	-3.70479	5.52669	1.98246	1.18463	-1.34886	3.05091
BRCA1_Pathway_E2_Responsive_Genes	primary_new	0.327355	-0.786859	-1.14375	0.361858	-0.0820316	1.0109	0.312522	-0.260371	0.106126	-0.660559
BRCA1_Pathway_G1_S_arrest	primary_new	0.85984	0.335824	-1.68443	-0.9179	-1.57495	2.37813	0.603482	-1.03539	-0.444098	-0.350744
BRCA1_Pathway_Growth_Promoting_Genes_hTert_S100A7	primary_new	1.67666	-0.392793	-0.831595	-0.946115	-1.5191	2.21347	-0.200523	-0.393523	0.251888	-0.316499
BRCA1_Pathway_Homologous_Recombination_Repair	primary_new	1.87419	-0.532237	-1.15863	-1.15881	-3.13737	3.16884	0.944015	-0.654362	-0.333718	-0.557958
BRCA1_Pathway_Mismatch_Repair	primary_new	0.218511	-0.535334	-1.16571	-0.163743	-0.127387	1.53431	0.239359	-0.744228	-0.333808	-0.634854
BRCA1_Pathway_NHEJ_DSB_Repair	primary_new	1.31706	-0.368954	-1.55514	-1.41129	-1.41123	2.63403	0.79552	-0.695457	0.302423	-0.62203
BRCA1_Pathway_Nucleotide_Excission_Repair	primary_new	0.749001	-1.36138	-1.02151	-0.831806	2.17813	0.732674	-0.445113	-0.0934442	-0.0865219	-0.616843
BRCA1_Pathway_Transciption_Coupled_Repair	primary_new	0.921385	-0.278588	-1.41325	-0.456233	-0.997729	1.42382	0.800603	-0.337747	0.126182	-0.390842
cAMP_Pathway	primary_new	-29.1005	20.7752	-3.17071	18.7098	-15.6612	-6.96965	15.417	-3.3487	2.90233	12.1514
cAMP_Pathway_Axonal_Growth	primary_new	2.17108	-2.07659	-1.04387	-1.69714	3.99484	1.51875	-2.86708	0.32474	-1.5078	-1.77861
cAMP_Pathway_Cell_Growth	primary_new	-10.2028	-2.6706	2.18843	9.73898	-6.11315	2.69847	4.36071	-2.45305	5.65715	-1.53864
cAMP_Pathway_Cell_Proliferation	primary_new	-1.83576	-1.16775	0.117067	1.21691	3.34995	-1.68369	0.00327304	1.27286	0.255956	-1.90129
cAMP_Pathway_Cell_Survival	primary_new	-7.84118	-6.5033	0.901461	9.38639	1.26477	1.23306	1.5588	-1.66646	5.27505	-3.40468
cAMP_Pathway_Chemotaxis	primary_new	-11.1971	-2.96855	2.51469	10.4521	-5.7803	3.20328	3.77586	-1.67207	5.63005	-1.93063
cAMP_Pathway_Cytokine_Production	primary_new	-12.7794	-0.394449	2.6588	9.56848	-7.37348	1.64499	6.67507	-1.35831	6.07611	0.902376
cAMP_Pathway_Degradation_of_Cell_Cycle_Regulators	primary_new	-3.11295	5.88022	0.63204	0.810528	1.20288	-6.53133	1.11862	0.769363	-1.11626	4.46597
cAMP_Pathway_Endothelial_Cell_Regulation	primary_new	2.92729	-10.9883	7.62828	2.61565	2.6774	6.61939	-11.4797	-3.10319	-0.789714	-6.56909
cAMP_Pathway_eNOS_Signaling_Cardiovascular_Homeostasis	primary_new	-2.87991	-0.597611	-0.581271	2.1351	3.46303	-2.41888	0.879539	0.50918	-0.90469	-2.07039
cAMP_Pathway_Fatty_Acid_Metabolism	primary_new	-14.6433	0.323592	-4.9571	12.8074	-2.635	-2.3244	11.4288	-1.91615	4.98733	-0.726602
cAMP_Pathway_Gene_Expression_via_NFKB2_CREBBP_ELK1	primary_new	-3.66625	5.53257	-1.99751	0.694858	-3.33083	-1.02474	3.7919	-0.944997	-0.700551	3.55369
cAMP_Pathway_Glycogen_Synthesis	primary_new	-2.35	-0.846744	0.903399	0.963043	4.55564	-1.91377	-1.31157	0.210967	-0.933289	-3.16883
cAMP_Pathway_Glycolisis	primary_new	0.849436	0.929832	1.15449	0.708526	-1.10827	-2.33674	-0.197271	-0.10639	-1.12917	-1.03807
cAMP_Pathway_Lipolysis	primary_new	-1.94182	-0.906127	-0.0104452	0.876776	2.90803	-1.40925	0.482832	0.554241	-0.179798	-2.31094
cAMP_Pathway_Metabolic_Energy	primary_new	-4.77774	5.95402	-0.14521	3.70807	-5.87561	-0.651345	1.78782	-0.540885	-2.41991	2.60579
cAMP_Pathway_Myocardial_Contraction	primary_new	-11.0036	8.08059	-11.5769	3.3612	-2.8894	1.68537	12.3427	-4.06983	6.63732	-1.11182
cAMP_Pathway_Oncogenesis	primary_new	-1.8135	-1.68772	0.494376	0.737998	4.06279	-1.45155	-0.342395	0.31431	-0.862633	-3.09125
cAMP_Pathway_Protein_Retention	primary_new	-2.37424	-1.42871	0.957698	1.4873	3.00601	-1.65857	0.0105127	-0.641089	0.322801	-2.73496
cAMP_Pathway_Regulation_of_Cytoskeleton	primary_new	-1.44119	-0.168517	-0.661303	1.26864	1.41897	-1.3084	0.891801	1.75235	-0.502734	-1.78781
Caspase_Cascade_Pathway	primary_new	25.8392	-25.3702	-8.85785	-18.116	31.1144	22.4803	-27.09	-18.9395	-4.83676	-26.7847
Caspase_Cascade_Pathway_Activated_Tissue_Trans-glutaminase	primary_new	2.44029	-7.70565	-10.6084	2.94475	5.55781	12.5467	-5.17543	-10.3192	-0.161467	-11.7685
Caspase_Cascade_Pathway_DNA_Fragmentation	primary_new	-0.618788	0.861327	-2.3466	0.818646	0.0010944	1.306	-0.0216791	-0.774028	-0.885113	-0.779199
CD40_Pathway	primary_new	-3.13007	7.63794	5.11237	-1.22752	-12.794	-2.28428	6.68559	1.53873	4.2094	8.52341
CD40_Pathway_Cell_Survival	primary_new	-0.178807	0.0915965	1.53919	0.205702	-1.57548	0.885861	-0.968068	0.0207338	0.347797	0.0343009
CD40_Pathway_Gene_Expression_Cell_Adhesion_Molecule_via_NFKB2	primary_new	1.44855	1.99005	-0.290139	-1.81193	-3.22563	0.471143	1.41796	-1.49468	-0.542468	2.14003
CD40_Pathway_Gene_Expression_Cell_Survival_via_NFKB2	primary_new	1.44855	1.99005	-0.290139	-1.81193	-3.22563	0.471143	1.41796	-1.49468	-0.542468	2.14003
CD40_Pathway_Gene_Expression_Co-Stimulatory_Molecules_via_NFKB2	primary_new	1.44855	1.99005	-0.290139	-1.81193	-3.22563	0.471143	1.41796	-1.49468	-0.542468	2.14003
CD40_Pathway_Gene_Expression_COX2_and_Prostaglandins_via_NFKB2	primary_new	1.44855	1.99005	-0.290139	-1.81193	-3.22563	0.471143	1.41796	-1.49468	-0.542468	2.14003
CD40_Pathway_Gene_Expression_Immunoglobulin_Class_Switch_via_NFKB2	primary_new	1.44855	1.99005	-0.290139	-1.81193	-3.22563	0.471143	1.41796	-1.49468	-0.542468	2.14003
CD40_Pathway_Gene_Expression_Pro-Inflamatory_Cytokines_via_NFKB2	primary_new	1.44855	1.99005	-0.290139	-1.81193	-3.22563	0.471143	1.41796	-1.49468	-0.542468	2.14003
CD40_Pathway_Gene_Expression_Procoagulant_Activity_via_NFKB2	primary_new	1.44855	1.99005	-0.290139	-1.81193	-3.22563	0.471143	1.41796	-1.49468	-0.542468	2.14003
Cellular_Apoptosis_Pathway	primary_new	20.1866	-26.2503	2.46711	-8.97336	22.7299	10.724	-20.8838	-8.66276	4.08989	-17.9706
Cellular_Apoptosis_Pathway_Depolarization	primary_new	0.517999	-0.225008	-0.493041	-2.26102	4.35197	-1.12511	-0.765786	0.265881	-0.229934	-0.56915
Cellular_Apoptosis_Pathway_DNA_Fragmentation	primary_new	-1.32335	0.788739	-0.731765	1.42517	0.0412083	1.02811	-1.22811	0.931778	0.210191	-0.423058
Cellular_Apoptosis_Pathway_Gene_Expression_BAX_BID_BAK_Ras_Noxa_PUMA_APAF1_Survivin_BCL2_via_TP53	primary_new	0.532567	-0.208418	-0.569997	-2.36737	3.38183	0.0251961	-0.793807	0.234359	0.692671	-0.458363
Cellular_Apoptosis_Pathway_Gene_Expression_FLIP_CIAP2_BFL1_BCL2_via_NFKB2	primary_new	1.03463	0.785202	0.23359	-1.02884	-2.29133	0.275356	0.991392	-0.951113	-0.105014	1.38062
Chemokine_Pathway	primary_new	-8.81529	22.509	-24.8602	-0.937337	-9.98645	6.49462	15.5957	1.45621	6.36938	2.80836
Chemokine_Pathway_Cell_Activation	primary_new	-6.7152	7.48105	-5.05053	-3.25762	0.344695	-4.30599	11.5036	1.43087	2.89886	4.59572
Chemokine_Pathway_Gene_Expression_and_Apoptosis_via_ELK1	primary_new	-4.11855	5.98215	0.560741	-4.60697	-4.58714	0.737744	6.03202	0.355813	2.34003	5.52874
Chemokine_Pathway_Internalization_Degradation_Recycling	primary_new	2.58338	7.43988	-4.08168	-0.0750867	-8.28376	0.84081	1.57646	2.56678	-3.30868	7.39344
Chromatin_Pathway	primary_new	2.91762	-2.12861	1.40375	-1.96929	1.60711	0.576706	-2.40729	2.10683	-3.20775	2.31752
Circadian_Pathway	primary_new	0.958454	3.00741	0.0732475	0.575874	-3.09466	-1.1699	-0.350421	-0.596529	-0.601413	0.904601
CREB_Pathway	primary_new	-25.2114	29.6576	-11.1722	11.8275	-35.5492	1.89208	28.5555	8.44345	3.70595	20.3108
Cytokine_Network_Pathway	primary_new	-2.99813	2.28514	8.04193	-8.49173	-11.2461	2.24882	10.1601	1.18395	8.83465	5.33258
EGF_Pathway	primary_new	-9.06942	0.942443	2.91121	4.6355	-7.3173	3.04864	4.84893	-1.26838	3.88453	0.540594
EGF_Pathway_Actin_Cytoskeletal_Rearrangement	primary_new	0.0661935	-3.62357	1.24495	1.69497	6.11002	-2.31757	-3.17501	-0.299837	0.675164	-1.3715
EGF_Pathway_Cell_Motility	primary_new	-0.927595	-1.12222	0.721489	1.67236	0.963817	-0.72823	-0.579615	0.284721	0.878128	-0.716583
EGF_Pathway_Cell_Survival	primary_new	-2.57454	2.41649	1.46309	2.39908	-2.28607	-0.475506	-0.942531	1.30373	-0.849205	1.16688
EGF_Pathway_Cytoskeleton_Regulation	primary_new	2.41411	-5.87969	0.937395	0.61806	2.527	2.15488	-2.77176	-0.80618	1.41829	-4.00201
EGF_Pathway_EGFR_Endocytosis	primary_new	-0.936094	-0.635312	0.00395747	1.65341	0.389536	-0.109928	-0.365565	-0.316505	0.12374	-0.590678
EGF_Pathway_Gene_Expression_via_FOS_NFKB2_MYC_STAT1_ELK1_STAT3_JUN	primary_new	-8.94534	7.769	0.53096	1.42528	-9.20997	-0.147288	8.57735	1.8274	4.8296	5.90205
EGF_Pathway_IP3_Signaling	primary_new	-1.21899	-1.1535	1.00568	1.89208	0.757552	-0.962324	-0.320502	0.446123	0.685067	-0.333299
EGF_Pathway_Rab5_Regulation_Pathway	primary_new	-0.740511	0.275194	-0.104969	0.0163188	0.454969	0.344115	-0.245117	-0.676732	-0.0414693	-0.333507
ErbB_Family_Pathway	primary_new	-12.1538	9.13531	8.08894	-0.207098	-11.8953	0.431807	6.60021	2.51775	7.36301	3.39157
ErbB_Family_Pathway_Anti-Apoptosis	primary_new	0.444143	-0.208038	-1.95901	-1.30289	0.52887	1.01345	1.48348	0.617253	0.264351	0.923402
ErbB_Family_Pathway_Gene_Expression_via_JUN_FOS_ELK1	primary_new	-10.568	11.1824	1.6696	-2.56712	-11.2311	-0.104044	11.6183	3.12674	5.28497	7.62632
ErbB_Family_Pathway_Translation	primary_new	-0.180484	-1.14269	0.256145	-0.0869693	0.547876	1.37465	-0.768524	-0.081973	1.3239	-1.34655
ERK_Signaling_Pathway	primary_new	-24.3202	16.0109	0.764442	10.3307	-46.2242	18.2317	25.2066	-5.62647	13.866	6.76689
ERK_Signaling_Pathway_Cell_Survival	primary_new	-4.72012	-0.106356	2.46468	0.655036	0.941551	0.759242	0.00597144	0.41055	1.32327	-1.97901
ERK_Signaling_Pathway_EGFR_signaling	primary_new	-1.34604	0.0635778	3.5303	-0.563004	-2.50881	0.716435	0.107543	-1.04495	0.759398	-1.35753
ERK_Signaling_Pathway_Gene_Expression_via_CAPN6_TP53_FOS_ATF1_MYC_ELK3_MYLK_ETS1_SRF_HIST1H3B_CREB3_STAT3_NFKB2_HMGN1_ESR2_ELK1_PAX6_JUN	primary_new	-12.8954	-0.371175	9.59172	15.9048	-10.3496	-2.25969	0.379399	4.31262	5.50404	-0.385713
ERK_Signaling_Pathway_Translation	primary_new	-1.39863	2.60108	1.87936	-1.7355	-2.99233	1.15589	0.490131	-2.3178	0.0869407	0.767418
Erythropoietin_Pathway	primary_new	-13.4896	21.6765	-1.43863	2.57969	-21.505	0.758284	11.4187	11.3174	1.48995	9.61153
Erythropoietin_Pathway_Anti-Apoptosis	primary_new	3.81635	-6.66538	2.37775	-2.47714	5.17516	1.83052	-4.05727	1.06041	2.91735	-4.82855
Erythropoietin_Pathway_BCLXL_Gene_Expression_via_STAT5B	primary_new	1.09778	0.31126	0.331097	0.436678	0.532458	-1.15868	-1.5506	-0.517666	-2.06643	0.479369
Erythropoietin_Pathway_Cell_Cycle_Progression	primary_new	-0.987558	4.76886	0.626845	-0.0588065	-8.32657	0.695624	3.28161	-0.830118	0.0283481	3.91366
Erythropoietin_Pathway_Cell_Survival	primary_new	-2.80678	15.9149	-2.44413	-3.21506	-13.6678	1.22263	4.99628	6.22054	-1.54646	6.91878
Erythropoietin_Pathway_Gene_Expression_Neuroprotection_via_NFKB2	primary_new	-0.849288	1.58536	0.706237	-0.72711	-1.40141	0.495131	0.191082	0.496182	-0.715719	0.743533
Erythropoietin_Pathway_GPI_Hidrolysis_and_Ca2+_influx	primary_new	-1.34604	0.909609	0.0880389	0.501253	0.082709	-0.735172	0.4996	0.509521	-0.441147	0.81354
Estrogen_Pathway	primary_new	-31.4217	27.9244	-12.3446	34.5692	-30.2354	-15.4845	26.9926	-1.58741	-15.1658	24.0062
Estrogen_Pathway_Anti-Apoptosis	primary_new	-2.76203	8.99532	-2.88165	8.58751	-7.91196	-2.25456	-1.77262	5.66408	-5.19188	4.19565
Estrogen_Pathway_Gene_Expression_via_FOS_JUN_ELK1_SP1_POLR2B_CREB3_NFKB2	primary_new	-14.0167	11.813	-0.997659	17.4213	-14.3422	-9.02422	9.14655	5.80589	-8.93295	10.9604
Estrogen_Pathway_Vasodilatation	primary_new	-0.993812	0.466741	-0.260831	0.538845	0.487035	-0.754377	0.5164	-0.0257429	-0.457236	0.198814
FLT3_Signaling_Pathway	primary_new	-10.9531	6.23614	9.734	9.08097	-11.6461	-1.49252	-0.959474	1.72599	3.51103	2.4761
FLT3_Signaling_Pathway_Transcription_via_ELK3_MAPK12_CREB3_STAT2	primary_new	-7.33366	1.09982	9.92737	5.77765	-6.57395	-1.76668	-1.13053	-0.0482611	5.04322	0.771427
FLT3_Signaling_Pathway_Translation	primary_new	-3.48636	-0.757641	2.09772	2.77832	1.48156	-0.663963	-1.44964	0.84479	2.03123	-2.11064
Glucocorticoid_Receptor_Signaling_Pathway	primary_new	8.6043	-3.45107	-5.59926	8.16936	6.96957	-1.41982	-13.2731	-4.10204	-13.6007	-7.04878
Glucocorticoid_Receptor_Signaling_Pathway_Cell_Cycle_Arrest	primary_new	-0.421169	-0.574876	-0.430197	0.191794	0.0863951	0.486707	0.661346	-0.522647	-0.417113	-0.81632
Glucocorticoid_Receptor_Signaling_Pathway_Cell_Cycle_Progression	primary_new	4.85769	-1.24054	2.07809	-2.92464	2.92603	-0.802185	-4.89445	0.50543	-5.73279	1.16347
Glucocorticoid_Receptor_Signaling_Pathway_Gene_Expression_via_CREB3_STAT5B_SLC22A2_POU2F1	primary_new	5.40253	-3.20001	2.09339	-0.52216	4.07945	-1.63876	-6.21444	0.839531	-6.63896	0.48012
Glucocorticoid_Receptor_Signaling_Pathway_Histone_Deacetylation	primary_new	-1.05132	0.141361	0.0159875	0.509312	0.652853	-0.740947	0.472757	0.0744502	0.278626	0.0754034
Glucocorticoid_Receptor_Signaling_Pathway_Inflammatory_Cytokines	primary_new	16.403	-7.90486	-6.18501	-1.77218	6.62787	3.32209	-10.4909	-2.81284	-11.7769	-8.81588
GPCR_Pathway	primary_new	-14.7501	18.7776	-14.5991	20.3417	-23.8642	-4.92506	19.0192	-7.24203	-7.98526	13.7253
GPCR_Pathway_Gene_Expression_via_JUN_NFKB2_ELK1_SRF_FOS_CREB3	primary_new	-0.294985	3.79871	1.06957	6.15259	-13.5143	-4.79441	7.58284	-4.08777	-0.955488	5.94328
Growth_Hormone_Signaling_Pathway	primary_new	-11.0616	13.2613	8.17933	-3.70753	-11.0407	-1.31147	5.68061	5.44609	3.81819	6.58816
Growth_Hormone_Signaling_Pathway_Cell_Survival	primary_new	-0.448531	7.17491	1.09823	-0.759701	-6.8179	0.427374	-0.674385	2.43425	-3.37974	3.62017
Growth_Hormone_Signaling_Pathway_Gene_Expression_via_SRF_ELK1_STAT5B_CEBPD_STAT1_STAT3	primary_new	-10.7683	11.5128	8.05271	-3.09144	-9.05566	-1.2554	4.60537	4.7878	2.44294	5.3039
Growth_Hormone_Signaling_Pathway_Glucose_Uptake	primary_new	-0.98434	4.30818	3.2863	0.773995	-4.39474	0.265666	-3.25507	2.2048	-2.94305	1.40864
Growth_Hormone_Signaling_Pathway_Protein_Synthesis	primary_new	0.864831	0.743913	-0.159075	-0.787176	-1.91874	0.816299	0.439952	0.386454	-0.041316	0.374213
GSK3_Signaling_Pathway	primary_new	0.668025	-17.8925	0.708748	11.44	11.8148	-0.94635	-5.79276	-7.74086	-1.80954	-23.9466
GSK3_Signaling_Pathway_b-CTNN_Degradation	primary_new	-3.094	0.864279	-0.85779	4.55951	-3.64536	-5.3395	7.51285	-0.901139	-4.19893	-1.55335
GSK3_Signaling_Pathway_Gene_Expression_via_CTNNB1	primary_new	-3.95817	0.677675	3.19955	13.1224	-6.45754	-7.88582	1.3019	0.600182	-8.88628	-5.21401
GSK3_Signaling_Pathway_Glycogen_Synthesis	primary_new	5.27808	-2.21293	1.98094	3.92187	1.4702	-1.62359	-8.81459	1.09098	-2.03431	-4.57346
GSK3_Signaling_Pathway_Protein_Synthesis	primary_new	5.30387	-2.86055	-0.642605	5.04862	1.42377	-0.854509	-7.41859	1.23059	-1.44376	-3.61829
HA_syntesis_pathway	primary_new	0.530474	3.48072	2.07406	-1.754	-3.86404	-1.24718	0.779965	1.03891	0.282486	5.41524
Hedgehog_Signaling_in_Mammals_no_Tubulin_Pathway	primary_new	-3.66218	19.0129	-3.19047	4.76948	-16.6129	-5.54509	5.22826	-0.924757	-3.20458	16.8988
Hedgehog_Signaling_in_Mammals_Pathway	primary_new	-4.25738	2.11349	-6.91698	7.93134	-11.7049	3.31625	9.51817	3.67617	2.17966	2.79855
HGF_Pathway	primary_new	-8.78423	14.1804	11.7406	-1.96444	-25.3209	-1.49177	11.6403	-4.27208	-1.90974	10.7948
HGF_Pathway_Anoikis	primary_new	-3.21869	8.00221	3.22168	0.32267	-7.5866	-0.024829	-0.716436	0.358098	0.200342	3.41222
HGF_Pathway_Cell_Adhesion_and_Cell_Migration	primary_new	-0.473197	1.91573	6.54625	-7.19248	-8.2107	1.4517	5.9627	-3.1879	1.09491	3.84915
HGF_Pathway_Cell_Cycle_Progression	primary_new	-2.27169	3.49027	2.02889	-0.0844382	-4.50656	-0.283844	1.62737	-0.519819	3.24115	2.39376
HGF_Pathway_Cell_Scattering	primary_new	-1.03371	4.19524	0.909764	1.43042	-3.81244	0.675091	-2.36437	1.37014	-3.57237	0.846933
HGF_Pathway_Cell_Survival	primary_new	-1.03371	4.19524	0.909764	1.43042	-3.81244	0.675091	-2.36437	1.37014	-3.57237	0.846933
HGF_Pathway_Gene_Expression_via_JUN_STAT3_FOS_ELK1_ETS2	primary_new	-3.56101	6.11436	2.74716	0.743324	-8.37898	-1.02662	3.36177	-0.937605	2.36885	4.55112
HGF_Pathway_IP3_Pathway	primary_new	-0.868787	0.670877	0.543347	0.685136	-1.34201	-0.718961	1.0304	0.215699	-0.671058	0.562072
HGF_Pathway_PKC_Pathway	primary_new	-1.43671	1.02382	-0.396622	0.877617	-0.667344	-1.18949	1.78873	0.72492	-0.521823	0.454396
HGF_Pathway_Regulation_of_Cytoskeleton_Cell_Polarity_and_Cell_Motility	primary_new	-1.86377	1.30949	0.463917	1.42834	-2.45598	-0.275867	1.39387	-1.10646	-1.49583	0.555835
HIF1Alpha_Pathway	primary_new	-0.266546	-0.97952	-5.35439	7.91263	-4.46553	-0.286688	3.44004	2.36215	6.67381	1.03544
HIF1Alpha_Pathway_Gene_Expression_via_JUN_CREB3	primary_new	-2.09602	0.972394	-2.12785	4.54538	-7.22094	1.11819	4.80885	0.560218	3.4541	2.08301
HIF1Alpha_Pathway_HIF1a_Degradation	primary_new	-0.621317	0.481692	-0.0148532	0.199403	-0.80252	0.095128	0.662467	0.469138	0.627147	0.331841
HIF1Alpha_Pathway_NOS_Pathway	primary_new	-2.59928	1.34397	-0.576105	3.4595	-6.44941	0.663481	4.15783	0.853566	3.39122	1.99771
HIF1Alpha_Pathway_p53_Hypoxia_Pathway	primary_new	-0.769804	-0.607945	-3.80264	6.82675	-3.694	-0.741393	2.78903	2.6555	6.61093	0.950143
HIF1Alpha_Pathway_VEGF_Pathway	primary_new	-2.59928	1.34397	-0.576105	3.4595	-6.44941	0.663481	4.15783	0.853566	3.39122	1.99771
Hypoxia_induced_EMT_in_cancer_and_fibrosis_3_copy	primary_new	-1.09922	0.15823	0.503542	0.620994	1.22047	-0.319212	-1.0848	0.342493	0.228943	-1.07748
IGF1R_Signaling_Pathway	primary_new	-7.73092	10.4969	4.94682	-6.91563	-27.6922	10.0071	16.8879	0.0718925	4.26958	13.072
IGF1R_Signaling_Pathway_Apoptosis	primary_new	1.33336	0.726974	-1.12115	-3.2207	3.59659	-0.57791	-0.737159	0.982407	0.353043	1.19951
IGF1R_Signaling_Pathway_Cell_Migration	primary_new	-0.355433	3.22684	7.65412	-7.49636	-13.0089	4.0799	5.89985	-2.85689	0.758246	6.10726
IGF1R_Signaling_Pathway_Cell_Proliferation_Diferentiation_and_Apoptosis	primary_new	-4.47641	8.13132	3.16059	0.533441	-12.1045	-1.55411	6.30969	0.490075	0.925925	7.49564
IGF1R_Signaling_Pathway_Cell_Survival	primary_new	2.37764	-2.65075	-2.15534	-2.15048	2.44787	2.44302	-0.31196	0.48424	1.96233	-2.3899
IGF1R_Signaling_Pathway_Gene_Expression_Proliferation_Growth_Survival_via_NFAT5_CREB3	primary_new	4.85308	-0.685058	-5.82146	-1.26544	0.673341	3.02702	-0.781476	-1.18421	-3.67967	0.0663459
IGF1R_Signaling_Pathway_Glucose_Uptake	primary_new	-4.74818	0.587297	1.49264	1.28804	1.04617	-0.536444	0.870475	1.32374	1.35789	1.02994
IGF1R_Signaling_Pathway_Glycogen_Synthesis	primary_new	-0.367399	-0.215584	-1.12129	-1.14324	0.441646	1.42849	0.977376	0.343225	-0.274307	-0.363377
IGF1R_Signaling_Pathway_Protein_Synthesis	primary_new	-0.235553	-3.06979	0.979477	0.161927	2.43313	1.23051	-1.4997	2.17341	1.52337	-3.54414
IL-10_Pathway	primary_new	-1.84027	7.7738	2.67986	0.199544	-7.99948	-0.956347	0.142903	1.43285	-2.23306	3.2378
IL-10_Pathway_IL-10_Responsive_Genes_Transcription_of_BCLXL_Cyclin-D1_D2_D3_Pim1_c-Myc_and_P19(INK4D)_via_STAT3	primary_new	-1.5321	6.58883	3.1736	0.996161	-6.46716	-2.2222	-0.537117	1.26758	-1.88021	3.97674
IL-10_Pathway_Inflammatory_Cytokine_Genes_Expression_via_STAT3	primary_new	-1.5321	6.58883	3.1736	0.996161	-6.46716	-2.2222	-0.537117	1.26758	-1.88021	3.97674
IL-10_Pathway_Stability_Determination	primary_new	-0.126449	-1.25829	0.600047	0.0480413	1.93801	0.144331	-1.34569	0.280844	0.482269	-3.73528
IL-10_Pathway_Translational_Modulation	primary_new	-1.46697	2.73093	-0.0873679	-0.311376	-4.09903	0.526647	2.70716	0.191526	-0.209751	1.63432
IL-2_Pathway	primary_new	-16.502	23.0922	-9.73064	12.7427	-30.4907	2.19918	18.6892	0.734298	-9.11896	18.5003
IL-2_Pathway_Actin_Reorganization	primary_new	0.0864007	-1.14253	-0.473153	0.32288	1.15755	0.91118	-0.862331	0.199743	-0.961656	-1.65503
IL-2_Pathway_Apoptosis	primary_new	0.0883378	-0.480673	-1.35326	-0.635226	1.37888	0.492444	0.509502	0.152745	-1.2261	-0.122019
IL-2_Pathway_Apoptosis_Inhibition	primary_new	-1.14803	5.07417	2.35532	1.02632	-3.24356	-0.670907	-3.39332	1.45792	-2.79046	1.14898
IL-2_Pathway_Gene_Expression_via_FYN_LYN_RPS6KB1_PTK2B	primary_new	-1.81552	2.53362	0.0579262	-0.800563	-4.49327	1.96891	2.54891	0.915916	0.013628	2.07485
IL-2_Pathway_IL2_Gene_Expression_via_POLR1E_EGR1_HMGA1_ELF1_POU2F1_MYC	primary_new	-7.95015	5.77168	-5.90993	6.35729	-9.83913	0.957142	10.6131	0.31679	1.72175	6.57299
IL-2_Pathway_Protein_Synthesis	primary_new	-0.340481	1.99855	1.56457	-0.800038	-3.47769	-0.129864	1.18495	-0.0339143	0.35411	1.59369
IL-6_Pathway	primary_new	-5.73703	-0.270307	2.77311	8.46904	-14.3316	4.2608	4.83603	-2.94463	3.47645	5.74549
ILK_Signaling_Pathway	primary_new	-21.6487	10.621	2.94937	12.4549	-46.5009	11.6219	30.5024	-0.305839	7.25817	18.5655
ILK_Signaling_Pathway_Actin_Polymerization_Cytoskeletal_Reorganization	primary_new	1.19848	-3.20326	-0.468336	0.115093	-2.70823	2.89262	2.17363	0.685365	2.1109	-0.516459
ILK_Signaling_Pathway_Apoptosis	primary_new	-0.0754126	-1.7738	-0.0642098	-0.203906	0.392495	0.63144	1.09339	1.09213	1.10614	-0.217879
ILK_Signaling_Pathway_Cell_Adhesion	primary_new	0.0640356	-0.200516	-0.0896571	0.0392281	0.215811	-0.0782485	0.0493468	0.0807207	0.0370711	0.118768
ILK_Signaling_Pathway_Cell_Cycle_Proliferation	primary_new	-0.468141	7.43305	8.89601	-7.45711	-13.8103	3.2573	2.14915	-1.81145	-2.28662	6.40413
ILK_Signaling_Pathway_Cell_Migration_Retraction	primary_new	-0.743039	6.61831	9.53735	-7.11752	-13.7053	2.88377	2.52645	-1.62691	-2.15778	6.14737
ILK_Signaling_Pathway_Cell_Motility	primary_new	1.03041	-3.14577	-0.402002	0.223897	-2.82385	2.65295	2.46436	0.739748	2.22524	-0.305123
ILK_Signaling_Pathway_Cytoskeletal_Adhesion_Complexes	primary_new	-0.40887	3.26614	5.08747	-3.73838	-14.1416	3.80394	6.13134	-0.773415	1.82467	1.67344
ILK_Signaling_Pathway_Epithelial_Mesenchymal_Transition	primary_new	-5.5889	-0.521608	4.27016	2.22727	-3.44556	0.839919	2.21872	0.0140422	1.44507	1.31893
ILK_Signaling_Pathway_Epithelial_Mesenchymal_Transition_Tubulo-Interstitial_Fibrosis	primary_new	-2.57386	7.95361	9.50097	-3.81393	-17.4114	3.35116	2.99344	2.22733	-1.55013	3.03362
ILK_Signaling_Pathway_G2_Phase_Arrest	primary_new	-0.468141	7.43305	8.89601	-7.45711	-13.8103	3.2573	2.14915	-1.81145	-2.28662	6.40413
ILK_Signaling_Pathway_Induced_Cell_Proliferation	primary_new	-2.14142	-0.218179	-0.916502	2.9231	-0.678866	0.0511783	0.980687	0.0863511	0.565212	-0.388405
ILK_Signaling_Pathway_Loss_of_Occludin_Barrier_Dysfunction	primary_new	-2.08647	4.33818	7.03424	-8.35001	-12.7153	4.41338	7.36599	-3.29068	1.98526	6.84973
ILK_Signaling_Pathway_Migration_Vasculogenesis	primary_new	-2.57386	7.95361	9.50097	-3.81393	-17.4114	3.35116	2.99344	2.22733	-1.55013	3.03362
ILK_Signaling_Pathway_MMP2_MMP9_Gene_Expression_Tissue_Invasion_via_FOS	primary_new	-1.60956	-1.24496	-3.51192	3.95316	-4.55824	4.73534	2.23618	-0.201841	2.38637	1.38378
ILK_Signaling_Pathway_Opsonization	primary_new	-0.168071	0.0574891	0.0663346	0.108803	-0.11562	-0.23967	0.290734	0.0543831	0.114336	0.211336
ILK_Signaling_Pathway_Regulation_of_Intermediate_Filaments	primary_new	0	0	0	0	0	0	0	0	0	0
ILK_Signaling_Pathway_Regulation_of_Junction_Assembly_at_Desmosomes	primary_new	0.0640356	-0.200516	-0.0896571	0.0392281	0.215811	-0.0782485	0.0493468	0.0807207	0.0370711	0.118768
ILK_Signaling_Pathway_Tissue_Morphogenesis	primary_new	-1.60956	-1.24496	-3.51192	3.95316	-4.55824	4.73534	2.23618	-0.201841	2.38637	1.38378
ILK_Signaling_Pathway_Tumor_Angiogenesis	primary_new	-0.554935	-0.644295	0.418646	0.316088	1.1294	-0.46755	-0.197357	0.0637036	-0.676542	-0.387106
ILK_Signaling_Pathway_Wound_Healing	primary_new	0.0640356	-0.200516	-0.0896571	0.0392281	0.215811	-0.0782485	0.0493468	0.0807207	0.0370711	0.118768
Interferon_Pathway	primary_new	-7.80527	2.6191	15.9307	8.36095	-27.3274	2.61986	5.60212	1.99	1.50511	4.46485
Interferon_Pathway_Gene_Expression_via_HIST1H3B_CREB3	primary_new	-6.34148	0.0582595	4.67164	8.13247	-8.95797	-1.71084	4.14792	3.94291	2.55087	1.55423
Interferon_Pathway_Transciption	primary_new	-0.0356462	9.65883	2.85774	0.845717	-11.9214	-0.880597	-0.524639	2.89988	-2.28061	7.03838
Interferon_Pathway_Translation	primary_new	0.592005	-1.19182	0.950203	-1.32101	0.159968	1.44066	-0.630003	-1.42311	0.740702	-1.41307
IP3_Pathway	primary_new	-10.9544	8.0617	-18.6134	14.8277	-15.0247	13.4856	8.21748	-0.705813	-3.45755	3.6198
IP3_Pathway_Gene_Expression_via_CREB3_NFATC2_MEF2D	primary_new	2.65134	0.651492	-6.50248	0.199629	2.73385	1.26525	-0.999094	-2.22733	-3.91741	-0.323332
JAK-STAT_Pathway	primary_new	-3.92725	10.9252	9.93568	-4.77007	-31.1429	10.4428	8.5366	2.6712	12.0256	17.7056
JAK-STAT_Pathway_Akt_Pathway	primary_new	-1.22693	5.47553	-0.0514058	1.8642	-5.77809	0.792309	-1.0756	1.8521	-3.7269	1.83557
JAK-STAT_Pathway_Gene_Expression_via_MYC	primary_new	-0.337683	0.816437	-0.255847	1.09324	-2.56927	0.193941	1.05918	0.5349	-0.645577	0.697313
JAK-STAT_Pathway_IFN-Inducible_Gene_Expression_via_STAT2_STAT1	primary_new	-1.66758	6.79845	7.92622	-6.40156	-15.942	3.94307	5.34336	-0.80448	6.48022	6.06566
JAK-STAT_Pathway_JAK_Degradation	primary_new	3.094	-0.864279	0.85779	-4.55951	3.64536	5.3395	-7.51285	0.901139	4.19893	1.55335
JAK-STAT_Pathway_Nml_SOCS_BCL-XL_p21_Myc_Nos2_Gene_Expression_via_STAT2	primary_new	-2.98265	2.36666	-2.26896	0.1514	-12.866	7.14894	8.45065	-1.33089	5.34072	12.3772
JNK_Pathway	primary_new	-9.42595	2.6665	5.68809	13.7045	-23.752	1.16399	9.95487	-3.90669	-3.28596	11.9385
JNK_Pathway_Gene_Expression_Apoptosis_Inflammation_Tumorigenesis_Cell_Migration_via_SMAD4_STAT4_HSF1_TP53_MAP2_DCX_ATF2_NFATC3_SPIRE1_MAP1B_TCF15_ELK1_BCL2_JUN_PXN_NFATC2	primary_new	4.95338	-7.9056	11.5391	1.60973	-6.21187	2.76637	-6.75115	1.18866	0.983786	-0.661237
JNK_Pathway_Insulin_Signaling	primary_new	1.29095	-0.805189	5.54825	-2.68979	-5.26995	2.33858	-0.412849	0.613387	2.57677	0.349668
MAPK_Family_Pathway	primary_new	-17.3671	24.8027	-2.09561	18.6851	-47.828	-8.24588	32.0488	4.83203	-5.25543	29.7641
MAPK_Family_Pathway_Chromatin_Remodelling	primary_new	-5.23923	1.03943	4.532	3.95299	-8.55734	0.0897644	4.18238	3.91176	2.69314	1.82312
MAPK_Family_Pathway_Cytoskeleton	primary_new	-2.07675	2.44916	1.62796	-1.87857	-3.0477	-0.000256315	2.92616	0.13009	0.971758	2.92888
MAPK_Family_Pathway_Gene_Expression_via_ATF2_JUN_ELK1_NFKB2_CREB3	primary_new	-2.20822	3.6889	0.651515	-2.43539	-6.2809	2.11078	4.47332	-0.364947	2.30107	4.21045
MAPK_Family_Pathway_Translation	primary_new	-0.502451	4.75219	-1.54807	-4.88415	-2.74364	1.28783	3.63829	-1.32772	0.581778	3.71295
MAPK_Signaling_Pathway	primary_new	-40.3116	30.8707	8.66773	17.4904	-48.2866	-12.1803	43.7496	4.74355	11.0771	27.0069
MAPK_Signaling_Pathway_Cell_Motility_Inflammation_Apoptosis_Osmoregulation	primary_new	-2.06061	-0.992704	1.56437	1.05678	-4.99907	1.67603	3.75519	-1.3356	1.75169	0.392883
MAPK_Signaling_Pathway_Cell_Survival	primary_new	-0.459811	0.886726	0.890229	0.458043	-1.45678	-0.722429	0.404019	0.0923777	-0.0645321	0.731042
MAPK_Signaling_Pathway_Gene_Expression_Apoptosis_Inflammation_Tumorigenesis_via_MYC_HSF1_STAT2	primary_new	-0.852567	-1.44165	6.77863	-0.386397	-3.71075	-1.07834	0.691078	-1.05319	2.33594	1.0717
MAPK_Signaling_Pathway_Gene_Expression_Cell_Proliferation_Cell_Survival_Tumorigenesis_Differentiation_Development_via_PXN_CREB3_RPS6KA5_RPS6KA6	primary_new	-6.93883	1.49506	11.0746	-4.76276	-12.52	4.18871	7.46323	-3.69933	2.76743	2.38514
Mismatch_Repair_in_Eukaryotes_Pathway	primary_new	-0.040194	2.74003	0.777206	-0.188663	-2.74057	0.803153	-1.35096	1.54606	1.87206	0.962342
Mitochondrial_Apoptosis_Pathway	primary_new	14.1739	3.37432	-2.01029	-7.87237	-7.96562	3.51845	-3.21838	-5.74737	-7.0618	11.7541
Mitochondrial_Apoptosis_Pathway_Apoptosis	primary_new	1.22423	-0.768896	-1.52455	-0.626094	-2.91684	5.5944	-0.982248	-0.446098	-2.54948	1.72204
Mitochondrial_Apoptosis_Pathway_Depolarization	primary_new	0.851769	-0.183189	-1.49525	-1.88425	1.94716	0.79634	-0.0325829	-0.61673	0.772776	0.0262941
Mitochondrial_Apoptosis_Pathway_DNA_Fragmentation	primary_new	-0.970671	0.489524	0.919123	0.564734	-0.775154	0.591815	-0.819371	1.00887	0.0693143	0.0555723
Mitochondrial_Apoptosis_Pathway_Gene_Expression_via_TP53	primary_new	0.807611	0.0192323	-1.37971	-1.79312	1.04213	1.12947	0.174391	-0.532424	1.29432	0.248821
mTOR_Pathway	primary_new	2.4306	13.4639	17.2929	-13.6042	-4.88007	-0.82889	-13.8742	10.7717	-1.28039	13.3777
mTOR_Pathway_Actin_Organization	primary_new	-1.62078	-2.19623	6.91444	1.22303	2.81321	-2.76122	-4.37245	3.64979	4.03392	-0.125709
mTOR_Pathway_Autophagy	primary_new	0.485608	0.699981	-1.3054	-1.22664	-2.39931	1.58674	2.15902	-0.970323	-0.130968	-0.80461
mTOR_Pathway_Cap-dependent_Translation	primary_new	1.38353	-1.54776	3.35016	-3.71454	-1.37085	2.4818	-0.582343	-2.43406	0.396776	-2.51379
mTOR_Pathway_Inflammation_Stress_Resistance	primary_new	0.253762	0.701202	0.483628	-0.983271	-1.55195	0.282415	0.814215	0.191622	-0.102645	0.616021
mTOR_Pathway_Lipid_Synthesis	primary_new	-3.58366	0.225191	5.43659	0.569324	1.89131	-2.57293	-1.96583	4.86809	5.38525	2.17053
mTOR_Pathway_Metabolism_Stress_Response_and_Apoptosis	primary_new	-1.10885	0.119462	0.442048	-0.184989	-0.774063	0.677667	0.828721	0.232018	1.50001	-0.622926
mTOR_Pathway_Microtubule_Organization	primary_new	-3.10521	0.579517	4.64784	0.152941	1.13787	-2.83031	-0.582646	3.56873	5.11814	1.26338
mTOR_Pathway_Mitochondria_Proliferation_and_Function	primary_new	0.710126	0.24187	-0.341098	-1.30233	0.88481	-0.560114	0.366734	-1.20143	1.11946	-0.299567
mTOR_Pathway_mRNA_Biogenesis	primary_new	-0.570511	-0.570583	1.29778	0.494544	-0.25075	0.415268	-0.815745	-0.0916759	0.94479	-1.18304
mTOR_Pathway_Ribosome_Biogenesis	primary_new	-0.214252	-1.13176	1.00124	0.313939	0.535265	0.506207	-1.01064	-0.239583	1.26876	-1.31346
mTOR_Pathway_Translation_Elongation	primary_new	1.32733	-2.17996	0.96348	0.097559	-0.386182	2.26382	-2.08605	1.6162	1.67752	-2.33066
mTOR_Pathway_VEGF_Pathway	primary_new	0.540315	0.373001	0.187095	-1.06461	-0.0878469	0.381183	-0.329139	-0.766234	0.401192	0.121061
NGF_Pathway	primary_new	-13.317	7.69869	0.701249	7.62902	-4.64877	-2.78699	4.72377	0.497444	-0.141595	8.33171
NGF_Pathway_Actin_Polymerization_Neurite_Outgrowth_and_Differentiation	primary_new	1.04325	-0.716119	-1.20833	0.60973	1.72389	0.262989	-1.71542	-1.84486	-3.27327	-0.0705044
NGF_Pathway_Apoptosis	primary_new	-5.05666	2.78965	0.649391	0.0192461	5.04016	-4.25108	0.809299	1.02332	1.50956	2.93178
NGF_Pathway_Gene_Expression_via_MYC_ELK1_CREB3_NFKB2	primary_new	-6.70242	4.47999	1.21985	0.563415	-3.54681	-0.134653	4.12063	0.473229	3.43219	4.88599
NGF_Pathway_Neurite_Outgrowth_and_Differentiation	primary_new	-5.66904	6.7895	0.761167	0.265853	-3.03858	-0.398025	1.28912	2.92931	-1.41063	3.51935
NGF_Pathway_Neuronal_Survival	primary_new	-0.932194	4.63021	1.41045	0.253978	-3.07595	-0.745469	-1.54103	2.22016	-2.31096	1.97755
Notch_Signaling_Pathway	primary_new	-2.78715	1.09647	-4.23915	7.73063	6.52549	-5.76405	-2.56225	-1.87257	-1.21144	-1.93816
Notch_Signaling_Pathway_gamma_Secretase	primary_new	2.25156	-0.120311	1.51821	-1.05155	0.780914	-1.36277	-2.01606	-0.371019	1.24664	-1.40596
Notch_Signaling_Pathway_Gene_Expression_Chromatin_Remodeling_via_RBPJ	primary_new	-5.0387	1.21679	-5.75736	8.78217	5.74458	-4.40128	-0.546191	-1.50155	-2.45808	-0.532203
Notch_Signaling_Pathway_Transcription_of_Target_Genes_Hairy_E-SpI_via_RBPJ	primary_new	-5.0387	1.21679	-5.75736	8.78217	5.74458	-4.40128	-0.546191	-1.50155	-2.45808	-0.532203
p38_Signaling_Pathway	primary_new	-32.203	35.275	-10.8089	11.1834	-44.7345	-4.51986	45.8079	9.31187	13.6732	43.2784
p38_Signaling_Pathway_Actin_Cytoskeleton_Reorganiztion	primary_new	-0.324203	1.01616	1.15781	-2.07693	-2.24718	0.978851	1.4955	-0.451027	0.474136	1.30657
p38_Signaling_Pathway_Apoptosis	primary_new	0	0	0	0	0	0	0	0	0	0
p38_Signaling_Pathway_Gene_Expression_Cell_Motility_Inflammation_Apoptosis_Osmoregulation_via_MEF2D_TP53_CREB1_ATF2_JUND_ETV1_NFKB2_AP2A1_MAX_FOSL1_CEBPG_ELK1_CDC25C_JUNB_STAT1_SP1_DDIT3_ELK4_CEBPA	primary_new	-5.35699	4.57406	1.83589	2.68368	-7.41043	-0.288508	3.96229	3.85786	2.04249	6.21747
p38_Signaling_Pathway_Translation	primary_new	-0.436547	2.9223	-0.823694	-0.976728	-3.05919	-0.180805	2.55467	-0.616578	0.00854721	2.48867
p53_Signaling_Pathway	primary_new	-4.30925	1.70706	-1.23902	5.25624	-1.35952	-5.80329	5.74779	-0.958488	1.37869	1.2955
p53_Signaling_Pathway_Apoptosis	primary_new	-2.72652	0.921141	-0.504224	-1.59702	0.703157	0.300978	2.90249	0.124796	1.9787	1.27828
p53_Signaling_Pathway_Breast_Cancer	primary_new	-2.17839	0.838912	-0.734312	-1.8741	1.69614	-0.0485824	2.30033	0.369111	1.75871	0.958571
p53_Signaling_Pathway_Cancer	primary_new	-2.72652	0.921141	-0.504224	-1.59702	0.703157	0.300978	2.90249	0.124796	1.9787	1.27828
p53_Signaling_Pathway_Cell_Cycle_Arrest	primary_new	-2.17839	0.838912	-0.734312	-1.8741	1.69614	-0.0485824	2.30033	0.369111	1.75871	0.958571
p53_Signaling_Pathway_Cell_Growth_Accumulation	primary_new	-2.17839	0.838912	-0.734312	-1.8741	1.69614	-0.0485824	2.30033	0.369111	1.75871	0.958571
p53_Signaling_Pathway_DNA_Repair	primary_new	-2.17839	0.838912	-0.734312	-1.8741	1.69614	-0.0485824	2.30033	0.369111	1.75871	0.958571
p53_Signaling_Pathway_Exosome_Mediated_Secretion	primary_new	-2.17839	0.838912	-0.734312	-1.8741	1.69614	-0.0485824	2.30033	0.369111	1.75871	0.958571
p53_Signaling_Pathway_Gene_Expression_Anti-Apoptosis_via_TP53	primary_new	-2.72652	0.921141	-0.504224	-1.59702	0.703157	0.300978	2.90249	0.124796	1.9787	1.27828
p53_Signaling_Pathway_Gene_Expression_Cell_Cycle_and_Cell_Growth_via_TP53	primary_new	-2.72652	0.921141	-0.504224	-1.59702	0.703157	0.300978	2.90249	0.124796	1.9787	1.27828
p53_Signaling_Pathway_Gene_Expression_Cell_Fate_and_Development_via_TP53	primary_new	-2.72652	0.921141	-0.504224	-1.59702	0.703157	0.300978	2.90249	0.124796	1.9787	1.27828
p53_Signaling_Pathway_Gene_Expression_Cell_Signaling_via_TP53	primary_new	-2.72652	0.921141	-0.504224	-1.59702	0.703157	0.300978	2.90249	0.124796	1.9787	1.27828
p53_Signaling_Pathway_Gene_Expression_DNA_Replication_and_Repair_via_TP53	primary_new	-2.72652	0.921141	-0.504224	-1.59702	0.703157	0.300978	2.90249	0.124796	1.9787	1.27828
p53_Signaling_Pathway_Gene_Expression_ECM_and_Adhesion_via_TP53	primary_new	-2.72652	0.921141	-0.504224	-1.59702	0.703157	0.300978	2.90249	0.124796	1.9787	1.27828
p53_Signaling_Pathway_Gene_Expression_Infection_and_Immune_Response_via_TP53	primary_new	-2.72652	0.921141	-0.504224	-1.59702	0.703157	0.300978	2.90249	0.124796	1.9787	1.27828
p53_Signaling_Pathway_Inhibition_of_Angiogenesis_and_Metastasis	primary_new	-2.17839	0.838912	-0.734312	-1.8741	1.69614	-0.0485824	2.30033	0.369111	1.75871	0.958571
p53_Signaling_Pathway_Inhibition_of_IGF1R_mTOR_Pathways	primary_new	0.291014	-0.729812	0.0139862	-0.803438	2.34218	-0.390819	-0.72311	0.193869	-0.16054	-0.272858
p53_Signaling_Pathway_Normal_Cell_Cycle_Progression	primary_new	-2.72652	0.921141	-0.504224	-1.59702	0.703157	0.300978	2.90249	0.124796	1.9787	1.27828
PAK_Pathway	primary_new	-5.00105	28.8519	-10.3776	-1.76295	-27.6681	-6.63603	22.5938	4.92042	-4.22539	23.3435
PAK_Pathway_Actin_Organization	primary_new	6.53599	10.926	-0.996361	-8.73631	-10.0636	2.81827	-0.483918	-0.845596	-4.00112	6.44827
PAK_Pathway_Cell_Survival	primary_new	6.53599	10.926	-0.996361	-8.73631	-10.0636	2.81827	-0.483918	-0.845596	-4.00112	6.44827
PAK_Pathway_Contractility_Stress_Fibres_and_Focal_Adhesion	primary_new	-4.11123	14.3689	-6.68984	0.709441	-9.94098	-8.74748	14.4111	-1.188	-1.57761	8.90092
PAK_Pathway_Lamelliopodia_and_Filopodia_Outgrowth	primary_new	5.04536	11.9669	-1.43356	-7.09243	-11.8464	4.76995	-1.40983	0.886218	-4.22887	6.8579
PAK_Pathway_Paxillin_Disassembly	primary_new	0.430727	-0.393268	0.673826	0.183187	0.371989	-0.459441	-0.80702	0.0927208	0.0390337	-0.707792
PAK_Pathway_Transciptional_Activation_and_Filopodia_Formation	primary_new	-0.951999	0.413944	2.1323	-0.260819	-3.73821	0.290829	2.11396	0.0488336	-0.11772	1.47019
PPAR_Pathway	primary_new	-1.64194	3.67115	4.12226	-4.00197	-9.10362	0.648719	6.30539	-2.43035	-4.53839	3.65473
PPAR_Pathway_Adipocyte_Differentiation_Glucose_Homeostasis_and_Macrophage_Function	primary_new	-0.811369	0.854944	-1.57545	1.41342	1.07986	-1.7572	0.795794	-0.562767	-0.899804	0.125761
PPAR_Pathway_Fatty_Acid_Metabolism_Lipid_Homeostasis_and_Skin_Proliferation	primary_new	-0.811369	0.854944	-1.57545	1.41342	1.07986	-1.7572	0.795794	-0.562767	-0.899804	0.125761
PPAR_Pathway_Peroxisome_Proliferation_Hepatocarcinogenesis_Fatty_Acid_Metbolism_and_Lipid_Homeostasis	primary_new	-0.811369	0.854944	-1.57545	1.41342	1.07986	-1.7572	0.795794	-0.562767	-0.899804	0.125761
PTEN_Pathway	primary_new	26.9541	-18.9515	-2.92808	-10.482	30.7327	9.42711	-34.7523	16.574	3.78782	-32.3864
PTEN_Pathway_Adhesion_or_Migration	primary_new	13.5726	-10.5062	-2.32239	2.17448	16.7276	7.8348	-27.4809	9.6244	3.98304	-13.1038
PTEN_Pathway_Angiogenesis_and_Tumorigenesis	primary_new	5.87007	3.30921	-6.28531	4.76617	0.664068	4.60671	-12.9309	4.31045	-0.130937	-1.23536
PTEN_Pathway_Apoptosis	primary_new	-0.779246	-4.61683	1.05405	-1.32999	13.9206	-3.72077	-4.52784	-0.663903	1.10598	-4.30265
PTEN_Pathway_Ca2+_Signaling	primary_new	5.87007	3.30921	-6.28531	4.76617	0.664068	4.60671	-12.9309	4.31045	-0.130937	-1.23536
PTEN_Pathway_Cell_Cycle	primary_new	-1.52527	4.99321	-7.8807	3.37907	5.85173	4.22277	-9.04081	5.03914	0.795038	2.95937
PTEN_Pathway_Cell_Survival	primary_new	-0.810752	-0.97156	1.40505	1.51026	1.00764	-1.28706	-0.853576	-0.344598	-0.6268	-1.05656
PTEN_Pathway_Differentiation	primary_new	-1.32912	3.95415	-8.08731	3.43445	6.95407	4.37427	-9.30051	5.19289	0.797403	2.21548
PTEN_Pathway_DNA_Repair	primary_new	5.28183	2.64406	-5.977	3.98193	3.11144	5.58837	-14.6306	2.37661	-3.21107	3.2499
PTEN_Pathway_Genomic_Stability	primary_new	4.86479	2.3225	-7.21525	3.00069	6.33308	4.77529	-14.0811	2.42513	-1.48992	3.26195
PTEN_Pathway_Growth	primary_new	-1.52527	4.99321	-7.8807	3.37907	5.85173	4.22277	-9.04081	5.03914	0.795038	2.95937
PTEN_Pathway_Migration	primary_new	11.5255	-1.88296	-4.33112	-4.20109	9.19464	6.67907	-16.984	4.84139	-1.22609	-1.99826
PTEN_Pathway_Neuronal_Survival	primary_new	0.47163	0.235033	2.5886	-2.63454	-0.865717	0.538804	-0.333803	0.277792	0.0499992	-0.355945
PTEN_Pathway_Proliferation	primary_new	11.3913	-4.61167	-1.88887	-1.58961	13.1025	5.6346	-22.0383	3.56832	-3.85466	-3.71699
PTEN_Pathway_Proliferation_CyclinA2_Geminin_AuroraA_PLK1	primary_new	6.32033	-7.59544	-5.38774	-0.296774	6.80997	3.52244	-3.37279	0.402554	0.448158	-8.69856
PTEN_Pathway_Protein_Synthesis	primary_new	0.242476	0.636152	-0.874623	-0.0551792	-0.545678	-0.432962	1.02981	0.357114	-1.15562	1.0792
PTEN_Pathway_Senescence_Ets2_p16	primary_new	6.32033	-7.59544	-5.38774	-0.296774	6.80997	3.52244	-3.37279	0.402554	0.448158	-8.69856
PTEN_Pathway_Synaptic_Transmission	primary_new	4.27271	2.64371	-9.23463	4.58326	8.17341	3.19858	-13.637	2.11441	-2.5477	2.91
RANK_Signaling_in_Osteoclasts_Pathway	primary_new	-3.68308	7.89272	4.34946	3.43706	-15.7684	2.55946	1.21281	3.74394	-3.30842	8.02022
RANK_Signaling_in_Osteoclasts_Pathway_Expression_of_Osteoclastic_Genes_via_JUN_NFAT5_NFKB2_MITF_FOS	primary_new	-3.20531	10.3725	2.54444	-1.99386	-15.4315	0.82532	6.88835	-0.702464	0.368915	8.96118
RANK_Signaling_in_Osteoclasts_Pathway_Inhibition_of_Death	primary_new	-2.61961	4.20721	3.63678	-0.496512	-3.29269	1.20558	-2.64077	3.20099	-1.40753	0.276332
RANK_Signaling_in_Osteoclasts_Pathway_Resorption	primary_new	-0.139801	6.23568	-0.827098	1.91314	-7.60322	2.25903	-1.83773	0.123041	-4.81612	3.17002
Ras_Pathway	primary_new	-29.2623	47.1252	-7.1732	17.8767	-56.8381	-3.82535	32.0969	-6.19366	-5.36708	36.9664
Ras_Pathway_Apoptosis	primary_new	-0.466336	8.6068	-0.605115	-0.115995	-9.041	0.540072	1.08157	1.07461	-2.61046	6.05814
Ras_Pathway_CDC42_Pathway	primary_new	0.55972	1.10422	-0.478202	0.13971	-1.24923	0.160134	-0.236353	-0.639055	-1.44527	0.365003
Ras_Pathway_Cell-Cell_Junctions	primary_new	-2.82404	-0.828364	-0.718941	7.59402	-5.64274	-1.14435	3.56442	-0.424446	-2.40874	1.37021
Ras_Pathway_Gene_Expression_Cell_Proliferation_Cell_Survival_Differentiation_Development_Cell_Cycle_Control_Cell_Motility_Tumorigenesis_via_ELK4_ATF2_MEF2D_STAT2_CREB3_CCNA1_MYC_ELK1_JUN_CDK4	primary_new	-3.11122	2.77595	1.48458	9.46221	-12.5991	-0.532233	2.51981	-3.52793	-0.88289	6.03305
Ras_Pathway_Golgi_Trafficking_and_Vesicle_Formation	primary_new	1.53445	0.350347	2.44358	-0.219891	0.0211517	-1.08267	-3.04698	-1.13536	-1.21645	-2.03308
Ras_Pathway_Increased_T-cell_Adhesion	primary_new	-1.06916	2.2389	5.77795	-7.2433	-8.03799	2.3698	5.96379	-2.70414	0.996522	4.5435
Ras_Pathway_Receptor_Endocytosis	primary_new	0.110811	0.689915	1.00592	0.338637	-1.99311	-0.316995	0.16482	0.241924	-0.356488	1.12529
Ras_Pathway_RhoA_Pathway	primary_new	0.145722	-1.83467	0.965867	0.776018	2.10023	0.427844	-2.58101	-0.299852	-1.59779	-1.08892
SMAD_Signaling_Network_Pathway	primary_new	-1.28274	4.46464	-2.99021	-4.01192	-5.92935	10.996	-1.24646	0.967178	1.88829	3.21162
STAT3_Pathway	primary_new	-3.33047	-3.07557	5.42806	-2.95545	-7.99099	-2.75079	14.6752	4.6051	14.8015	9.82568
STAT3_Pathway_Anti-Apoptosis	primary_new	0.529087	-1.48419	0.19133	0.349189	1.17266	-0.415049	-0.343031	-0.497442	0.605596	-0.616912
STAT3_Pathway_G1_to_S_Cell_Cycle_Progression	primary_new	1.35057	-0.682208	0.683996	0.104998	0.776197	-0.188182	-2.04537	0.0146074	1.07628	-0.781645
STAT3_Pathway_Growth_Arrest_and_Differentiation	primary_new	-11.1593	-2.10769	3.54079	6.63726	-1.88524	-7.67503	12.6492	3.21051	10.3992	13.8697
Target_drugs_pathway	primary_new	8.69358	-16.8702	1.65127	-12.2963	11.7557	15.1021	-8.03615	-13.5459	0.32932	-16.0253
TGF-Beta_Pathway	primary_new	-3.7778	8.62701	12.1043	-0.319871	-15.7843	-1.22477	0.37537	2.92271	-2.11529	10.5737
TGF-Beta_Pathway_Epithelial_Mesenchymal_Transdifferentiation	primary_new	0.59204	3.68425	1.65546	-0.387345	-2.09131	0.228038	-3.68114	1.67239	-3.1207	0.975964
TGF-Beta_Pathway_Post_Transciptional_G1_Arrest	primary_new	4.52755	3.56528	4.27867	-5.31025	3.11244	-2.7336	-7.44009	0.2812	-3.02318	-1.21519
TGF-Beta_Pathway_Transciption_Arrested_Growth_Apoptosis	primary_new	0.0761321	2.18263	5.24765	-2.49406	-3.89224	-1.95948	0.839367	0.637924	1.50819	3.88385
TGF-Beta_Pathway_Transciption_Cell_Growth_and_Mobility_and_Angiogenesis	primary_new	0.0761321	2.18263	5.24765	-2.49406	-3.89224	-1.95948	0.839367	0.637924	1.50819	3.88385
TNF_Signaling_Pathway	primary_new	-4.2524	-1.10683	-4.4313	5.15204	-8.16457	5.48647	7.31659	-1.11019	-2.28614	5.53218
TNF_Signaling_Pathway_Apoptosis	primary_new	-1.08481	0.00172665	-3.69237	2.00819	-0.825328	1.52107	2.07152	-2.70873	-2.0223	0.138398
TNF_Signaling_Pathway_Gene_Expression_and_Cell_Survival_via_FOS_NFKB2_JUN_ELK1_ATF6	primary_new	-3.06821	2.31585	-2.1635	1.42289	-9.91257	4.41311	6.99243	-1.14753	0.869191	5.05997
TRAF_Pathway	primary_new	-10.9577	2.49867	10.5311	3.1786	-4.65036	-5.55251	4.95222	5.74882	2.24422	7.93876
TRAF_Pathway_Apoptosis	primary_new	-1.09623	-0.221088	-0.596934	1.03635	-0.696647	1.69243	-0.117878	0.183	-1.7308	-0.0414846
TRAF_Pathway_Cell_Survival	primary_new	-1.17806	3.18247	3.88556	0.663355	-2.10472	-0.406024	-4.04259	1.15748	-2.55068	0.431094
TRAF_Pathway_Direct_Antimicrobial_Response_and_Cell-Mediated_Immunity_and_Apoptosis_of_Host_Cell	primary_new	0.0131933	0.857624	1.06587	-0.862479	-1.55986	0.274508	0.211136	0.533784	-0.163779	0.200055
TRAF_Pathway_Gene_Expression_via_FOS_JUN	primary_new	-2.88442	3.5943	1.88256	-0.180096	-5.90712	-1.11333	4.60812	0.766119	1.25332	3.86743
Ubiquitin-Proteasome_Dependent_Proteolysis_Pathway	primary_new	16.885	-33.118	23.4947	-10.4651	62.075	-10.6426	-48.2291	7.95184	5.4635	-22.1145
VEGF_Pathway	primary_new	-16.1194	12.5368	4.30118	2.26554	-13.2533	0.783805	9.48534	6.59899	0.0171227	7.72495
VEGF_Pathway_Actin_Reorganization	primary_new	-0.812353	-0.066291	-0.670547	0.821601	-2.24722	3.24271	-0.267904	0.825031	-0.453095	0.664641
VEGF_Pathway_Cell_Migration	primary_new	-0.812353	-0.066291	-0.670547	0.821601	-2.24722	3.24271	-0.267904	0.825031	-0.453095	0.664641
VEGF_Pathway_Cell_Survival	primary_new	-0.546596	2.88461	2.65826	0.672956	-2.10945	-0.0845609	-3.47522	1.7084	-2.53457	0.323912
VEGF_Pathway_Focal_Adhesion_Turnover	primary_new	-0.661993	-0.653349	0.940176	0.223633	0.838342	-0.593344	-0.093465	0.171057	0.0248559	-1.14291
VEGF_Pathway_Gene_Expression_and_Cell_Proliferation_via_MAPK7	primary_new	-2.49396	6.09636	0.945205	-1.41383	-8.30648	0.311102	4.86161	-0.043153	0.281974	5.38697
VEGF_Pathway_Nitric_Oxide_Production	primary_new	-0.535399	-0.604485	-0.610035	0.3514	-0.0135356	0.552117	0.859937	0.431519	0.026858	0.126345
VEGF_Pathway_Prostaglandin_Production	primary_new	-4.02593	6.24222	0.287376	-2.10209	-5.13209	-1.53832	6.26884	0.46016	0.879099	5.02392
WNT_Pathway	primary_new	0.24736	8.38779	-8.31291	0.821659	12.1315	-5.97109	-7.30425	11.1691	11.7698	9.89117
WNT_Pathway_Cell_Fate_Proliferation_Differentiation_Adhesion_and_Survival	primary_new	2.10043	-11.9218	4.41775	-1.21672	12.4024	4.00072	-9.78281	0.827215	7.00682	-2.05672
WNT_Pathway_Cell_Survival	primary_new	-2.86718	2.33961	-1.25028	5.17686	-4.54971	-6.42975	7.58045	-0.101985	1.01533	2.87066
WNT_Pathway_Cytoskeletal_Rearrangement	primary_new	-0.500748	0.041145	0.317022	2.08193	-2.15258	-0.477877	0.691109	-0.465937	0.819195	0.318404
WNT_Pathway_Gene_Expression_via_CREB3	primary_new	-7.58932	11.9752	-6.21137	5.96884	-7.97856	-4.62495	8.46012	5.65112	2.99968	11.6787
WNT_Pathway_NFAT_Pathway	primary_new	-1.75413	7.68807	-1.17362	-2.21867	-5.64467	-0.599541	3.70255	3.08572	0.457377	5.23445
WNT_Pathway_PKC_Pathway	primary_new	-14.4225	16.566	-5.43089	6.04572	-11.5186	-4.56284	13.323	7.58094	5.48364	12.1202

## Sheet: CNR
SYMBOL	ChMAP-28_1.25 µM	ChMAP-28_2.5 µM	ChMAP-28_5 µM
AATK	0.231152	0.386628	1.95148
ABCB1	0.630613	0.253392	1.01003
ABCB4	1.14483	0.917861	1.00939
ABCC1	0.813404	0.980435	0.767772
ABCC3	0.592142	0.940794	0.563896
ABCG2	1.04497	0.419609	0.489051
ABHD12	1.24447	1.22371	0.441773
ABI1	1.13698	1.2244	0.566381
ABL1	0.801586	0.556153	1.37984
ABL2	0.884013	0.65565	0.605519
ACAN	0.991473	1.10614	0.797383
ACHE	0.921938	0.770463	1.00766
ACIN1	0.800016	0.450433	1.21333
ACTA1	1.08194	0.607833	1.37208
ACTA2	1.31879	1.30906	1.35317
ACTB	1.24456	1.37774	1.11839
ACTC1	0.790441	0.901386	0.735857
ACTG1	0.922913	0.853148	0.484417
ACTG2	1.89563	0.590032	0.869832
ACTN1	1.02787	0.994956	0.624169
ACTN2	1.17912	1.25783	0.454195
ACTN3	1.02324	1.02403	0.687321
ACTN4	1.00271	1.0801	1.03016
ACVR1	1.12918	0.995803	0.366758
ACVR2B	0.69467	1.25411	0.607702
ACVRL1	0.918045	2.28307	0.501369
ADAM17	0.551727	0.723998	1.10363
ADAM33	1.24833	1.61468	0.0549642
ADCY1	0.637558	1.36924	0.677017
ADCY10	0.955198	1.13397	1.15834
ADCY2	1.12498	0.819217	1.14617
ADCY3	0.965043	1.89426	0.0513772
ADCY4	1.1289	1.3399	0.739712
ADCY5	1.54832	1.77704	0.421778
ADCY6	1.24823	2.22919	0.576814
ADCY7	2.99997	3.962	0.151231
ADCY8	0.75653	1.46306	0.683105
ADCY9	0.993007	1.16592	1.04495
ADD1	0.379107	1.19701	0.56161
ADD3	0.780754	0.882898	1.10026
ADORA1	0.359065	1.05929	0.560996
ADORA2A	0.403254	0.674546	1.40119
ADORA3	0.537935	1.04271	1.28712
ADRA1A	0.315609	0.38698	0.991505
ADRA1B	0.802046	0.541394	0.937484
ADRA1D	0.632099	0.900259	1.31408
ADRA2B	0.758386	0.861017	0.787031
ADRA2C	0.841627	0.975867	0.517299
ADRB1	0.9225	0.475373	0.952402
ADRB2	1.51687	0.698576	0.875321
ADRB3	0.839337	0.648765	1.293
ADRBK1	1.60668	0.745044	0.756526
ADRBK2	1.00446	0.486412	0.916787
AGO1	1.67941	1.00394	0.728976
AGO2	1.45312	0.754463	0.880381
AGPAT9	1.43508	0.576622	1.07127
AHR	0.698959	0.950785	0.904147
AHRR	0.666454	0.44068	0.746039
AIFM1	0.595274	0.776937	1.11101
AIP	0.673889	0.725584	0.517605
AKAP1	0.539218	0.418527	0.524537
AKAP10	0.974701	0.573198	0.864044
AKAP11	0.824286	0.97001	1.02707
AKAP12	1.26846	0.924881	0.570858
AKAP13	0.918089	1.18325	0.643947
AKAP3	1.28521	0.906484	0.907581
AKAP4	1.02938	1.243	1.52821
AKAP5	1.07863	0.448618	0.803745
AKAP6	0.931937	0.862683	0.950329
AKAP7	1.47153	0.786766	0.943097
AKAP8	0.992576	0.617057	0.894672
AKAP9	1.1297	0.971524	1.05185
AKT1	1.31672	1.18327	0.765411
AKT1S1	1.0608	1.11865	0.958269
AKT2	0.955186	0.681994	0.863327
AKT3	1.0301	1.14679	0.961391
ALK	0.854918	0.898056	0.579048
ANAPC1	1.93996	0.446231	0.368637
ANAPC10	1.71183	1.42292	0.443333
ANAPC11	0.994718	1.24035	0.617394
ANAPC13	1.24631	1.40682	1.01222
ANAPC2	0.520825	0.72251	0.450094
ANAPC4	0.522343	0.898362	0.606494
ANAPC5	1.24696	1.46706	0.865227
ANAPC7	0.735303	1.12715	0.511379
ANGPT1	1.5691	1.10054	0.442621
ANGPT2	0.832353	1.24196	0.652181
ANGPT4	0.946634	0.936921	1.09342
ANGPTL1	1.41652	1.66677	0.391632
ANGPTL6	1.21013	0.885905	0.936859
APAF1	2.43279	2.63032	0.679273
APC	1.00541	1.33395	0.447721
APH1A	0.74777	1.72883	0.93459
APH1B	1.22046	1.15678	0.585975
AR	0.647807	1.19805	0.894776
ARAF	0.373466	2.35606	0.1253
AREG	0.717539	1.51132	0.291003
ARF1	0.475744	0.947791	0.819393
ARF3	0.446677	1.60253	1.08481
ARF4	0.695451	1.20277	1.1034
ARF5	0.458011	0.898359	1.29886
ARF6	0.832448	1.41709	0.841963
ARFGAP1	0.75089	0.789792	0.813162
ARFGAP3	0.758925	0.92046	0.782768
ARFIP1	1.37493	0.87858	0.563992
ARFIP2	0.956264	1.32374	0.797483
ARHGDIB	1.24905	1.43077	0.774778
ARHGEF1	1.07515	0.934674	0.899319
ARHGEF10	1.45034	0.586977	0.540861
ARHGEF11	0.892291	0.718238	1.15386
ARHGEF12	1.34812	0.626488	0.979981
ARHGEF15	0.690357	0.759247	0.503122
ARHGEF16	0.288085	0.381787	0.773074
ARHGEF2	0.827659	1.12819	0.8571
ARHGEF3	0.912711	0.850261	0.711636
ARHGEF4	0.863116	0.499211	1.03659
ARHGEF5	0.825278	0.62513	0.77053
ARHGEF6	0.631012	1.00777	0.718955
ARHGEF7	1.10461	1.19714	0.730909
ARHGEF9	0.954692	1.12788	0.609224
ARID1A	1.05821	1.1205	0.75446
ARNT	0.838001	0.759049	1.39563
ARNTL	0.943917	1.01063	1.25349
ARR3	2.36798	0.687947	1.08652
ARRB1	1.54291	0.996363	0.997007
ARRB2	1.1018	1.19643	0.95922
ATF1	1.04914	0.766354	1.18166
ATF2	1.19564	1.30128	0.969182
ATF3	1.00134	0.661442	0.641085
ATF4	0.883363	1.57451	0.893243
ATF5	1.15224	1.40251	0.972094
ATF6	0.837872	0.618212	0.429913
ATF7	0.958263	0.662907	0.595808
ATG101	0.800166	1.40011	1.61199
ATG13	1.16702	1.13183	0.773208
ATIC	0.947185	0.604485	0.789612
ATM	0.780829	1.28556	0.624964
ATP2C1	0.735958	0.850603	0.694047
ATP6V1B2	0.581608	1.06969	0.877701
ATR	0.841913	1.05394	0.999709
ATXN1	0.846596	0.790133	1.31106
ATXN10	0.970446	0.90072	1.24147
ATXN2	0.994968	1.04672	0.62905
ATXN3	0.814908	0.892698	0.910319
ATXN7	1.21512	2.15636	0.228323
AURKA	1.38479	1.15117	0.661262
AXIN1	1.1094	1.25544	0.529909
AXIN2	1.06777	1.15559	0.542013
AXL	0.885743	1.94346	0.574853
BAD	1.25975	1.38145	1.17929
BAK1	0.753166	1.31055	0.47399
BAX	0.735866	1.2165	0.898985
BBC3	0.774135	1.22578	0.775312
BCAP31	0.545392	1.41456	0.480971
BCAR1	0.394285	1.77908	0.893158
BCL10	0.740229	1.1627	0.480099
BCL2	0.498401	0.886602	1.20415
BCL2L1	0.613813	1.16292	0.622701
BCL2L11	0.991997	1.07696	1.11532
BCL9	1.2494	1.02799	0.446599
BCR	0.93646	1.00278	0.616749
BDNF	1.13112	1.24072	0.962827
BGLAP	0.80131	0.602742	0.891819
BHLHE40	1.03693	0.94024	0.606719
BHLHE41	1.84495	1.67584	0.693016
BID	1.50024	0.621006	1.10634
BIRC2	5.88243	0.695271	0.912939
BIRC3	1.20897	0.519522	0.911912
BLK	0.572753	0.61845	1.39018
BMF	0.97405	0.752777	0.831932
BMP1	0.845083	1.00692	0.893086
BMP15	0.633385	0.50675	0.637955
BMP2	1.17712	0.693212	0.629456
BMP3	1.50542	0.209736	0.656838
BMP4	1.07829	0.846904	0.855793
BMP5	0.776273	0.593848	1.49184
BMP6	0.966164	1.13021	0.716354
BMP7	0.909598	1.03752	0.833879
BMP8A	0.850964	1.07474	1.1116
BMP8B	0.746828	1.02212	1.25907
BMPR1A	1.20241	1.07688	0.901137
BMPR1B	0.919769	0.809713	0.856549
BMPR2	2.48017	1.60385	1.05231
BRAF	0.888008	1.03497	0.749166
BRCA1	0.750277	1.07683	0.70894
BRF1	0.519535	0.740597	1.30072
BTC	0.709497	0.79509	0.969027
BTK	1.16169	0.893128	0.387627
BTRC	0.644066	0.707892	0.368837
CACNA1A	0.810542	0.731041	1.43813
CACNA1B	0.870919	0.715261	0.554133
CACNA1C	0.82069	0.78626	0.836931
CACNA1D	0.80104	0.946708	0.381741
CACNA1E	0.503302	0.896888	0.466358
CACNA1F	0.481627	0.925452	0.488541
CACNA1G	1.01374	1.10468	0.766788
CACNA1H	0.642549	1.02902	0.351195
CACNA1I	0.984573	1.07818	0.683142
CACNA1S	0.765069	0.519686	0.884709
CACNA2D1	1.15561	1.25639	0.191221
CACNA2D2	1.2278	1.20661	0.7429
CACNA2D3	1.20299	1.57489	0.43809
CACNA2D4	1.08317	1.22633	0.944912
CACNB1	1.28259	1.36506	1.34199
CACNB2	1.30343	1.31162	0.623484
CACNB3	0.962453	1.14392	0.437495
CACNG1	1.01022	1.33328	1.54851
CACNG2	1.09998	1.61689	0.964941
CACNG3	0.643554	1.31582	0.577235
CACNG4	0.73052	1.27465	0.926744
CACNG5	0.587851	0.973904	0.986916
CACNG6	0.486634	0.905046	1.20001
CACNG7	0.600578	1.45845	0.412672
CACNG8	0.708826	1.08078	0.828094
CALM1	0.658798	0.999356	0.420159
CALM2	0.858387	1.299	0.741224
CALM3	0.651583	0.983227	0.976935
CAMK1	1.24245	0.922796	0.840342
CAMK1G	1.24607	1.30395	0.814218
CAMK2A	1.35161	1.15019	0.810287
CAMK2B	1.13073	0.685987	1.07582
CAMK2D	0.976095	0.724292	0.988063
CAMK2G	1.29212	1.24368	0.809614
CAMK2N2	0.914866	1.06768	0.557725
CAMK4	0.724585	0.525601	1.37883
CAMKK1	0.611137	0.371604	0.862906
CAMKK2	0.926493	1.05356	0.962253
CAPN1	0.798313	0.628649	0.954387
CAPN11	1.46796	1.60376	0.950233
CAPN2	1.00473	0.551485	1.113
CAPN3	0.812849	1.84141	1.49682
CAPN5	1.4203	0.863803	0.594045
CAPN6	1.19132	1.0846	0.861557
CAPN7	1.12959	0.995395	1.13406
CAPN9	1.4368	1.38719	1.12837
CAPNS1	1.33536	0.880209	0.741997
CARD10	0.854733	0.820786	2.34886
CASP1	1.28555	0.680939	0.91682
CASP10	0.526507	0.69868	0.428502
CASP12	0.763296	0.824486	0.898281
CASP2	0.483287	0.618563	0.964601
CASP3	0.84248	0.469508	1.07799
CASP4	0.913945	1.05553	1.7573
CASP5	1.33827	1.15301	0.806627
CASP6	0.507393	0.756149	0.608144
CASP7	0.722399	0.576666	1.09449
CASP8	0.7251	1.16498	1.41387
CASP9	0.564869	0.651374	1.35843
CAV1	0.733999	0.756486	0.995337
CAV2	1.02796	1.76452	0.122789
CBL	0.583321	0.568638	0.931503
CBY1	0.791136	0.903654	1.74353
CCL1	0.767764	0.573149	0.938001
CCL11	0.55053	0.793408	0.501447
CCL13	0.640979	0.633385	0.76059
CCL14	1.13182	1.30628	0.783249
CCL15	1.12432	1.25696	1.32244
CCL16	0.873007	1.02448	1.0387
CCL17	0.986313	1.15886	0.370899
CCL18	0.970237	0.791278	0.633776
CCL19	1.10687	0.822815	0.843375
CCL2	1.27394	1.27832	0.988088
CCL20	0.997969	1.36325	0.475854
CCL21	1.08716	1.08671	1.00813
CCL22	0.828466	1.16068	0.793372
CCL23	0.951174	0.747954	0.741278
CCL24	0.794196	0.987698	0.70345
CCL25	0.59216	1.12239	0.902331
CCL27	0.716446	1.00632	0.526514
CCL28	0.900576	0.947156	0.666561
CCL3	0.653597	0.963165	0.673029
CCL3L1	0.6828	1.2741	1.15498
CCL4	0.734788	1.55652	0.450397
CCL4L1	1.10886	1.75219	0.604752
CCL4L2	1.01989	1.60287	0.644816
CCL5	1.28567	1.70886	0.930369
CCL7	1.94368	0.835948	0.84462
CCL8	1.21926	1.15996	0.545134
CCNA1	1.72294	0.870416	0.767646
CCNA2	1.27763	1.32648	0.763504
CCNB1	0.469184	0.738513	1.35362
CCNB2	1.08078	0.648342	0.892051
CCNC	0.647231	0.78319	1.27432
CCND1	0.548743	0.976373	1.34485
CCND2	0.995028	1.27501	0.760238
CCND3	1.06315	0.884432	1.10581
CCNE1	0.554026	0.633903	1.71325
CCNF	1.19394	0.874434	1.09281
CCNG1	1.77133	2.34215	1.69181
CCNT1	1.11058	0.946621	0.964963
CCNT2	1.11624	0.795489	0.962958
CCR1	1.12102	0.921236	0.9356
CCR10	1.06491	1.26618	1.02185
CCR3	1.11235	1.20835	1.4555
CCR4	0.702586	0.930395	0.901789
CCR5	0.998108	0.84016	0.647511
CCR6	0.832431	1.04021	1.01905
CCR7	0.733811	0.595498	0.447565
CCR8	0.834963	1.43688	1.19326
CCR9	0.844497	0.947777	1.58008
CCRL2	0.792619	0.826602	0.483935
CD14	0.864117	0.749103	0.853162
CD2	0.822806	0.7609	1.51682
CD247	0.50534	0.510827	0.549875
CD27	0.740857	1.10723	0.690381
CD28	0.615246	0.620218	0.607659
CD3D	0.594898	0.695498	0.898367
CD3E	0.65659	0.791297	0.55781
CD3G	1.27304	0.906201	0.815386
CD4	1.12918	1.09555	1.05793
CD40	0.875048	1.04053	0.941021
CD40LG	0.966391	1.40356	0.776278
CD70	1.23605	1.12413	1.42302
CD79A	1.1158	0.69867	0.575762
CD79B	1.36088	1.0808	0.993479
CD80	0.960876	1.281	0.527075
CD86	0.956819	0.972192	1.26471
CDC16	0.886662	0.912567	0.546161
CDC23	1.17798	1.14295	0.436541
CDC25A	1.01499	0.923627	0.893093
CDC27	0.737467	1.57369	0.404052
CDC37	0.707876	1.22741	1.14561
CDC42	0.586956	0.582917	0.858752
CDH1	0.950281	1.40771	1.03031
CDH10	1.0159	1.05929	1.16038
CDH11	1.12759	1.48801	0.494192
CDH12	1.40708	1.13365	0.656006
CDH13	0.965741	1.76821	0.362115
CDH15	1.31079	0.939832	1.10832
CDH16	1.02232	0.908072	0.691796
CDH17	1.16755	0.873814	0.670546
CDH18	0.41516	0.761459	2.40862
CDH19	0.809109	0.871619	0.269664
CDH2	0.954279	0.572777	0.897773
CDH20	0.878148	0.77606	1.08236
CDH22	0.835615	0.865393	1.14395
CDH23	1.10726	0.857444	1.15283
CDH24	1.02646	0.766973	1.31559
CDH26	1.54456	0.975712	1.20911
CDH3	0.90775	0.58889	1.86544
CDH4	1.33928	1.51175	1.58772
CDH6	0.97543	1.20783	1.17868
CDH7	1.23813	1.29663	0.858929
CDH8	1.3251	0.870684	1.444
CDH9	1.31298	1.07865	0.714995
CDK10	0.791119	1.23073	1.32769
CDK16	0.478099	0.494895	0.692172
CDK19	0.672735	0.677298	0.400568
CDK2	1.01757	0.632831	0.736867
CDK3	1.06709	1.08079	0.756928
CDK4	0.724222	0.685326	0.723838
CDK5	0.740619	1.05299	1.1581
CDK6	0.505535	0.709434	0.820501
CDK7	1.02045	0.891496	0.868666
CDK8	0.715397	0.595952	0.590332
CDK9	0.396205	0.658817	0.437076
CDKN1A	0.555806	0.609374	0.819734
CDKN1B	1.0717	0.713883	1.18232
CDKN2A	1.14062	1.16167	1.43092
CDKN2C	0.910642	0.949591	0.449995
CEBPA	0.877677	0.967066	0.385265
CEBPB	0.970795	1.01199	0.908196
CEBPD	0.816245	0.642799	0.704083
CENPC	0.925544	1.04466	1.62668
CER1	1.20517	1.21634	0.813912
CES1	0.719279	0.95452	0.598294
CFL1	1.09239	1.1751	0.780938
CFL2	1.0289	0.977597	1.03433
CFLAR	1.19006	0.6455	1.04822
CHEK1	0.936364	1.38967	0.596281
CHEK2	1.0114	0.927435	1.21204
CHRNA1	0.95913	1.13218	0.405828
CHRNA10	1.00607	1.06571	0.575168
CHRNA2	1.06139	1.33986	0.578713
CHRNA3	1.25366	1.01506	0.422183
CHRNA4	0.928302	1.10515	1.25548
CHRNA5	1.19602	1.21209	0.702165
CHRNA6	0.905402	1.90067	0.671329
CHRNA7	0.875419	1.5286	0.493041
CHRNA9	0.871947	0.811331	1.85629
CHRNB1	0.516853	0.959421	0.777823
CHRNB2	1.01871	1.05217	0.797732
CHRNB3	0.720959	0.840299	0.760897
CHRNB4	0.892201	1.26068	1.18411
CHRNE	1.12119	1.43835	1.16203
CHRNG	0.915467	0.584715	0.783763
CHUK	0.74268	0.73072	2.56245
CISH	1.72402	0.829049	0.838479
CLCA1	0.758766	0.455075	2.4581
CLCA2	0.838435	0.650977	1.83839
CLCA3P	1.49596	1.21746	1.28548
CLCA4	0.605875	0.643436	0.959583
CLCN1	0.82418	0.809738	1.43756
CLCN2	1.03017	0.911836	1.34829
CLCN3	1.14187	0.932244	1.65365
CLCN4	0.918186	0.903492	0.899261
CLCN5	1.06512	1.28967	0.974271
CLCN6	0.969039	1.06562	1.20162
CLCN7	0.708543	0.709762	0.998129
CLCNKA	1.009	0.830405	0.802884
CLCNKB	1.37952	1.12693	0.678587
CLEC11A	0.683004	0.614207	0.635404
CLEC14A	0.601972	0.794851	0.696408
CLEC7A	0.71271	0.903547	0.527643
CLIC1	1.21243	1.60839	0.802159
CLIC2	0.840054	1.26915	1.35428
CLIC5	0.785431	0.507504	0.595831
CLIC6	1.1708	0.733876	1.22758
CLIP1	0.819705	1.07809	0.768789
CLNS1A	0.343454	0.869813	0.613301
CLOCK	1.35495	1.6897	1.46894
CLU	0.547828	0.838318	0.706333
CNGA1	1.03735	0.951104	0.698072
CNGA2	0.80702	0.788516	0.501289
CNGA3	1.00342	1.07043	0.899928
CNGA4	0.652235	0.793458	0.70077
CNGB1	0.732631	1.09788	1.34002
CNGB3	0.624443	0.917349	0.798261
CNKSR1	1.34438	1.22976	1.21372
COL10A1	0.824525	1.39912	0.630271
COL11A1	1.29297	1.43225	1.33254
COL11A2	0.990886	1.45636	1.37391
COL12A1	0.82578	0.875924	0.652436
COL13A1	0.690331	0.918348	0.57243
COL14A1	1.21772	1.08441	0.682593
COL15A1	1.2381	1.22712	1.0975
COL16A1	1.14007	0.723186	0.50621
COL17A1	1.06606	0.88254	1.11747
COL18A1	1.2313	0.885782	1.03588
COL19A1	1.34154	1.23326	0.529445
COL1A1	1.21243	0.918808	1.09304
COL1A2	1.08672	1.03533	0.738502
COL20A1	1.01806	0.882123	0.574455
COL21A1	1.64613	1.85268	0.660942
COL22A1	1.04469	1.37824	0.777443
COL23A1	1.09653	1.26843	0.761928
COL24A1	1.00273	1.58974	0.552862
COL25A1	0.691447	1.08173	1.06684
COL27A1	0.96411	1.40367	1.14707
COL2A1	0.669595	0.789486	0.735835
COL3A1	0.641836	0.625923	0.424404
COL4A1	0.590884	0.404106	1.65069
COL4A2	1.27625	1.42123	0.457438
COL4A3	0.725561	0.504553	0.909442
COL4A4	1.02231	0.835869	1.27952
COL4A5	0.865915	0.417973	0.914113
COL4A6	0.865249	0.957907	0.904594
COL5A2	0.804799	0.559017	0.938847
COL5A3	0.99487	0.913598	2.1595
COL6A1	1.0306	0.716907	1.27985
COL6A2	0.957577	1.06362	0.94829
COL6A3	1.27729	0.781316	1.02659
COL7A1	0.547843	0.993433	0.80509
COL8A1	0.997951	1.02417	1.20832
COL8A2	1.15575	1.02435	0.980009
COL9A1	1.17554	1.25145	0.795034
COL9A2	1.26186	1.25541	1.08407
COL9A3	0.765576	0.755414	1.33105
COPS5	1.15501	1.98846	0.77954
CRADD	0.896968	0.8904	1.5586
CRBN	0.606693	0.700619	1.00072
CREB1	0.884682	1.06003	1.16033
CREB3L4	0.704686	0.646047	0.81634
CREBBP	0.50588	0.696435	0.728988
CREM	0.789409	0.651394	0.461149
CRHR1	0.571668	0.600338	0.652625
CRHR2	0.413506	0.746506	0.667313
CRK	0.615616	0.669861	0.870607
CRKL	0.676239	0.701612	1.22816
CRP	1.00798	1.06878	1.04058
CRY1	0.776627	1.09006	0.547348
CRY2	0.880377	1.03184	1.54898
CSF1	0.717894	0.904117	1.22503
CSF1R	1.12291	1.09364	1.25237
CSF2	0.846561	1.5613	0.921026
CSF2RA	1.03993	1.20436	1.00634
CSF2RB	0.977692	1.01129	1.51333
CSF3	0.938557	1.04658	1.30636
CSF3R	1.35638	1.443	1.64073
CSK	0.600982	0.92955	0.654315
CSNK1A1	1.26172	1.09967	1.3347
CSNK1D	1.17044	1.19784	1.74068
CSNK1E	1.00371	1.31302	0.792029
CSNK1G1	1.50039	0.963999	1.2919
CSNK1G2	1.69378	1.25021	0.761124
CSNK1G3	1.16026	0.918194	1.33622
CSNK2A1	1.45225	1.21638	0.663341
CSNK2A2	1.13037	0.828483	0.812486
CSNK2B	1.24196	0.857511	0.805671
CTBP1	0.911505	0.712095	1.36981
CTBP2	0.997051	1.08779	0.975618
CTGF	1.36392	1.10337	0.766121
CTNNA1	0.670231	0.791441	0.847562
CTNNB1	0.665592	0.681217	0.530595
CTRC	0.590007	0.65823	0.613823
CTSG	0.686799	0.671358	0.642413
CUL2	0.115248	0.0765278	1.16291
CX3CL1	1.04486	0.610781	0.919691
CX3CR1	2.18715	1.1258	1.2129
CXCL1	1.08344	0.81158	1.2181
CXCL10	1.09181	0.540246	1.34755
CXCL11	1.38499	0.472021	1.02666
CXCL12	0.908707	0.716302	1.14021
CXCL13	1.10201	1.03275	2.44309
CXCL14	1.2418	1.21509	0.861601
CXCL16	1.11488	0.711363	0.881705
CXCL2	1.39924	0.6763	1.41454
CXCL3	0.759033	0.737625	0.850978
CXCL5	1.0721	1.00098	1.65964
CXCL6	0.996863	0.931809	2.33399
CXCL8	1.22055	0.947866	1.56339
CXCL9	0.830941	1.10149	0.998989
CXCR1	0.829461	0.757361	1.63015
CXCR2	0.742556	0.814096	1.78481
CXCR3	0.718449	0.800964	0.938362
CXCR4	0.822694	1.10192	0.99598
CXCR5	0.920795	1.02712	1.04398
CXCR6	1.02473	0.924817	1.32925
CYCS	0.584038	0.78959	0.872654
CYP17A1	1.31089	1.15003	1.42832
CYP19A1	1.02286	0.734737	1.64647
CYP2C19	1.19836	0.619343	0.893082
CYP2C9	1.35442	1.28036	1.14935
CYP2D6	1.27257	1.06568	0.800106
CYP2J2	0.554345	0.901824	0.52354
CYP3A4	0.698057	0.910871	0.643788
CYP3A5	1.12564	1.12004	1.22177
CYR61	0.684988	0.868391	1.32003
DAAM1	0.700772	1.68493	0.752486
DAAM2	1.16273	2.22972	1.76421
DAGLA	1.09407	1.06205	0.740323
DAP	1.07652	1.03791	1.2476
DAPK3	0.966042	0.926795	0.863144
DAXX	0.879287	1.31089	1.09791
DBT	0.750154	1.36156	0.689102
DCC	1.30303	1.20971	1.01264
DCHS1	0.921954	1.16647	0.673579
DCX	1.30798	1.09158	1.0667
DDIT3	0.966621	0.859079	1.26227
DDIT4	1.19762	0.978679	0.743813
DDR1	1.52201	1.07401	1.88792
DDR2	1.13099	1.02331	0.737815
DDX17	1.35131	1.26916	0.736299
DFFA	0.903157	0.573109	1.26445
DFFB	1.34873	1.15522	0.808473
DGKZ	1.02016	0.919917	0.801556
DHFR	1.05903	1.59215	0.696752
DHH	0.707862	0.9718	0.706654
DHODH	0.553196	0.487705	1.11003
DIABLO	0.690859	0.975854	1.04423
DIRAS3	1.03571	1.2819	0.841601
DKK1	1.00302	0.0834225	1.26369
DKK2	1.19591	0.308288	1.24159
DKK4	0.764452	0.557163	0.926774
DLG1	1.19981	0.863057	1.15062
DLG4	1.38936	1.03477	2.23203
DNMT1	1.17742	1.21032	2.75834
DOCK1	0.581393	0.686231	1.68557
DOK1	1.30281	1.00055	1.36274
DOK2	1.39332	1.56031	2.36385
DOK3	0.995473	0.752532	1.70972
DOK4	0.953996	0.729943	1.9265
DOK5	1.16381	0.95928	1.08631
DOK6	1.77082	0.214256	1.01281
DSCAM	1.04122	0.502429	1.02136
DUSP1	1.1361	0.953691	1.13153
DUSP10	1.15368	0.860928	2.26316
DUSP14	1.00093	0.757818	1.22804
DUSP16	1.09641	0.68466	1.39977
DUSP3	0.719978	1.23897	2.51114
DUSP4	1.08096	0.719512	1.19471
DUSP6	1.35787	1.58969	1.10443
DUSP7	0.528716	0.792455	1.12301
DUSP8	0.564336	0.951797	0.774214
DUSP9	0.795083	0.802116	1.2733
DVL1	0.572173	0.682458	1.61193
DVL2	0.722135	0.962949	0.805975
DVL3	0.879708	1.0258	0.900757
DYNLL1	1.41038	1.78762	0.776298
DYNLL2	0.723432	0.906839	0.769512
ECM1	1.06761	1.17651	0.768245
ECM2	0.914821	1.11049	0.870907
EFEMP1	0.951636	1.13091	1.38341
EFEMP2	0.798922	0.96533	0.883824
EGF	1.1842	1.22146	0.711001
EGFR	1.24189	1.18701	1.03322
EGLN1	0.865467	0.983448	0.963618
EGLN2	1.12025	1.18678	1.47883
EGR1	1.04832	1.05606	0.921393
EIF2A	1.13049	1.18058	0.945376
EIF2AK1	0.94684	1.17018	0.610658
EIF2AK2	1.24618	0.90576	0.904253
EIF2AK3	0.528265	1.40226	0.644236
EIF2B1	1.36183	1.06016	1.34794
EIF2B2	0.81762	1.27882	0.704748
EIF2B3	1.53187	1.35677	1.15206
EIF2B4	1.07476	1.09939	1.24067
EIF2B5	0.655921	0.445334	0.696693
EIF2S1	1.65313	1.54976	0.746997
EIF2S2	1.78083	1.00801	0.638973
EIF2S3	1.19596	1.199	0.718458
EIF4A1	1.23836	1.1204	0.723824
EIF4A2	0.892506	1.33689	0.821407
EIF4B	0.688998	0.621121	0.650375
EIF4E	0.473915	0.73994	1.4051
EIF4EBP1	0.646098	0.79702	0.644212
EIF4EBP2	1.28232	1.02937	1.64008
EIF4EBP3	0.759076	0.506214	0.82044
ELANE	0.834851	1.06699	0.846488
ELF1	0.679207	0.777561	0.852558
ELK1	0.903803	0.738976	1.95166
ELK3	0.989649	0.719121	1.11883
ELK4	1.77072	1.21112	1.6088
ELN	1.3256	0.722819	1.89425
ELP2	1.142	0.748844	2.20776
EML4	1.31459	1.10394	2.31456
ENDOG	1.87134	1.08528	1.50525
EP300	1.11988	1.03036	0.774655
EPHA1	0.950243	0.68413	1.65553
EPHA2	1.23287	0.72447	1.02574
EPHA3	0.715048	1.1243	1.15725
EPHA4	1.449	0.793013	1.70443
EPHA5	0.809945	0.947566	2.25813
EPHA6	0.74736	0.97434	1.03437
EPHA7	1.40638	1.12598	1.45106
EPHA8	1.00789	0.73513	0.950868
EPHB1	0.832348	0.857146	2.07497
EPHB2	0.793109	0.865995	0.887507
EPHB3	0.889374	0.615648	0.872437
EPHB4	1.18264	0.738763	0.95734
EPHB6	0.6917	0.545613	1.67601
EPHX2	0.394516	0.694701	0.705361
EPO	0.849808	0.858059	1.2121
EPOR	1.13331	0.671085	1.42066
EPS8	0.59288	0.916526	0.730425
EPYC	1.42471	1.30436	1.25597
ERBB2	0.849427	1.37269	0.809516
ERBB3	1.16896	1.17556	1.1298
ERBB4	0.732396	1.44904	0.661205
EREG	0.783168	1.90838	0.76996
ESR2	0.839472	1.20556	1.10191
ETS1	0.958013	1.42894	1.13793
ETS2	0.636917	1.66021	0.865455
EXO1	0.943676	2.76463	0.860222
F2	1.20297	1.30505	0.767912
F2RL3	1.21994	1.19086	1.37136
FADD	0.882733	1.93448	1.0241
FAS	1.09642	1.82105	0.691375
FASLG	1.07966	1.60637	1.15576
FASN	1.55301	1.52728	1.76822
FBLIM1	1.1238	1.25335	0.890068
FBN1	1.48766	1.46035	4.54235
FBN2	1.50022	1.33547	0.928339
FBN3	1.15706	1.11474	1.41338
FBXW7	0.93301	0.814272	1.04693
FCER2	0.981484	1.11438	0.803045
FCGR1A	1.33127	0.840276	0.677418
FCGR3A	1.07019	1.08243	1.00822
FEN1	0.688151	0.795586	0.870824
FERMT2	0.898507	0.624071	0.930307
FGF1	1.10783	1.28042	1.43174
FGF10	0.626896	0.720839	1.02999
FGF11	0.957156	1.11463	0.80498
FGF12	1.66983	1.25388	0.934192
FGF13	0.866028	0.516085	0.723777
FGF14	0.842346	0.816278	0.800203
FGF16	0.745164	0.411363	1.22378
FGF17	1.03781	0.515948	1.32903
FGF18	0.935287	1.00153	0.978358
FGF19	1.01893	0.673654	1.00843
FGF2	1.68984	1.46425	2.55502
FGF20	0.844598	0.924927	2.4727
FGF21	1.45037	1.15585	1.15286
FGF22	0.895542	1.04535	0.743684
FGF23	1.04357	0.638256	1.0109
FGF3	0.572142	0.720012	1.01566
FGF4	1.05504	0.829752	1.16665
FGF5	1.06824	1.24015	1.44736
FGF6	1.63773	1.7475	2.29986
FGF7	0.935883	1.27129	1.19891
FGF8	0.870167	0.896764	1.61642
FGF9	0.680263	0.809479	1.11192
FGFR1	0.927576	0.859442	1.09973
FGFR2	1.1301	1.15348	1.17704
FGFR3	0.893107	1.74226	1.13421
FGFR4	0.867418	0.613225	0.790103
FGR	1.19097	1.32329	1.34925
FIGF	0.966196	0.742944	1.18156
FKBP1A	0.618981	1.19959	2.01408
FKBP4	0.930432	1.24678	0.965733
FLNA	1.01186	0.699292	0.852538
FLNB	0.600979	1.31098	1.17399
FLNC	1.04768	1.37565	0.794275
FLT1	0.863834	1.07334	0.564022
FLT3	0.741437	1.04427	0.68186
FLT3LG	0.910917	1.19016	0.884596
FLT4	0.915188	0.928036	0.877367
FN1	0.948688	1.16711	1.20338
FOS	0.636473	1.56622	0.816505
FOSB	0.804196	1.35095	1.15175
FOSL1	1.55174	1.34928	1.31546
FOSL2	0.987245	1.09589	1.65684
FOXH1	0.793494	1.56822	0.893786
FOXO1	0.980934	1.27317	0.681689
FOXO3	0.854203	1.33552	1.18681
FPGS	1.16312	1.21793	1.13385
FPR2	1.03322	1.21374	0.795605
FRAS1	1.48488	1.64364	0.766139
FRAT1	0.843336	0.924435	0.822207
FRAT2	1.10692	1.35456	1.18516
FREM1	1.06913	1.04632	0.50575
FREM2	0.93766	1.16979	0.84643
FRK	1.01385	0.759372	0.894174
FRZB	1.07066	0.682362	0.923784
FYB	0.928266	0.984572	0.515755
FYN	0.846174	0.852384	1.12353
FZD1	1.04694	1.18596	0.953389
FZD10	0.762432	0.888722	0.822434
FZD2	0.8686	0.943534	0.85081
FZD3	0.760162	0.407889	0.92586
FZD4	0.779351	0.390456	1.82129
FZD5	1.10571	0.419354	1.2325
FZD6	0.885275	0.194053	1.334
FZD7	2.41922	0.9295	1.30192
FZD8	0.769892	0.79301	1.99827
FZD9	0.945011	0.840089	1.21495
GAB1	0.904256	0.907286	1.88189
GAB2	1.1927	1.27164	1.55749
GABRA1	2.08474	0.898996	1.36435
GABRA2	1.29797	1.07917	0.980429
GABRA3	0.954736	0.910361	1.04021
GABRA5	1.0784	1.05601	1.37666
GABRA6	1.04085	0.5958	1.44092
GABRB1	0.756707	0.897817	1.02699
GABRB2	1.4926	1.13141	1.53203
GABRB3	0.910114	0.957035	1.47262
GABRD	0.726454	0.952077	1.66935
GABRE	0.903798	0.953198	1.01482
GABRG1	0.774757	0.956301	1.30481
GABRG2	0.618535	1.2283	0.732675
GABRG3	0.693204	0.57846	1.04051
GABRQ	0.817239	0.928627	2.02263
GART	0.87412	0.986815	1.61136
GAS1	1.48598	1.38017	1.4745
GAS2	0.262701	0.768953	0.775175
GAS6	1.0205	0.894202	2.35135
GAS8	0.865203	0.97678	2.03502
GATA1	1.28563	0.904243	2.28696
GATA2	1.02665	1.57778	1.22929
GCFC2	2.22899	2.4723	1.17408
GCGR	0.997685	1.35321	1.16156
GDF1	0.978563	0.611484	1.23966
GDF10	1.5486	0.950661	1.60058
GDF15	1.08833	1.48082	0.832736
GDF2	1.5264	1.33501	1.49597
GDF5	1.58713	1.06585	1.85132
GDF6	1.16869	1.67768	1.7647
GDF9	0.976692	1.04391	1.71657
GDNF	1.09763	1.47914	1.69205
GFER	1.11629	1.20956	1.18294
GFRA1	1.57369	1.51669	2.1736
GFRA2	1.51782	2.5093	0.971592
GFRA3	0.831944	1.07013	1.42572
GFRA4	1.19042	0.875868	0.917867
GH1	0.789941	1.86141	1.04043
GH2	1.15184	1.27436	0.820183
GHR	1.22172	1.14987	0.582378
GHRH	1.20963	0.745854	1.43759
GLI1	0.916379	1.62907	0.808294
GLRA1	0.997019	1.07297	1.09129
GLRA2	0.842626	0.871549	0.520985
GLRA3	0.961957	0.947327	0.747546
GLRA4	0.735392	1.02014	1.73111
GMFG	0.988303	0.968596	0.601777
GNA11	0.850461	0.452003	1.20036
GNA12	0.948759	0.96132	4.55627
GNA13	3.75521	1.10906	2.38048
GNA14	1.51516	0.832329	1.80701
GNA15	0.443747	0.517644	0.805061
GNAI1	2.99681	1.01241	0.860053
GNAI2	2.91787	1.12361	0.866298
GNAI3	1.25843	1.45497	1.78364
GNAL	1.0769	0.788697	1.01256
GNAO1	1.31469	0.917843	0.843776
GNAQ	2.07516	1.72678	2.04076
GNAS	1.21435	0.955282	1.19144
GNAT1	1.25916	1.333	1.19389
GNAT2	0.980408	0.719585	1.11317
GNAZ	1.08258	0.986655	1.38955
GNB1	1.459	1.75573	1.54652
GNB2	1.53592	1.61724	1.25905
GNB2L1	0.949713	1.12069	0.794972
GNB3	0.378329	0.408005	1.27916
GNB4	0.753003	1.12691	1.78299
GNB5	0.831178	0.837098	2.1296
GNG10	0.658275	0.781502	1.11436
GNG11	0.503758	0.832542	0.862066
GNG12	0.752691	0.890831	1.16242
GNG13	0.998156	0.983408	0.919834
GNG2	0.873843	0.879926	0.926199
GNG3	1.05069	1.56155	0.991165
GNG4	1.16485	1.14823	1.45734
GNG5	0.708791	0.955521	1.37164
GNG7	0.750854	1.09909	1.1477
GNG8	1.16485	1.1451	1.18077
GNGT1	0.916465	1.33828	1.32536
GNGT2	0.995116	1.10105	2.17601
GNRH1	1.22845	0.927315	1.41731
GNRH2	1.44878	1.08859	1.95819
GNRHR	1.37128	1.94021	1.09695
GPC6	0.143728	1.21879	1.22932
GPLD1	0.569009	1.53312	0.982219
GRAP2	1.19907	1.31811	1.23256
GRB10	0.912733	1.21269	1.37998
GRB14	0.884109	0.942152	1.49653
GRB2	1.11349	1.50864	1.45955
GRB7	1.44475	1.28131	1.16777
GRIA1	0.981972	1.67624	1.19722
GRIA2	1.3049	1.2917	0.620196
GRIA3	1.15045	1.27326	1.17718
GRIA4	1.14562	1.23829	0.962138
GRID2	0.909544	1.49503	0.633026
GRIK1	1.01864	1.2091	1.46406
GRIK2	1.01671	1.11153	1.03789
GRIK3	0.926475	1.02699	0.703975
GRIN2A	0.895672	1.0492	0.606066
GRIN2B	1.10667	0.949462	0.84276
GRIN2C	0.733495	1.1379	1.16042
GRK1	0.551655	0.883152	1.326
GRK4	0.59678	0.690718	1.25123
GRK5	1.3255	1.15541	12.1073
GRK6	1.67558	0.56969	1.79502
GRK7	1.26464	0.61545	1.47567
GRM1	1.54315	0.785216	1.45546
GRM2	1.22198	1.81421	2.71574
GRM3	0.942589	0.652223	1.44752
GRM4	0.946819	0.828414	2.27524
GRM5	1.53137	1.18974	1.23965
GRM6	1.06449	1.12247	1.51233
GRM7	0.828479	0.732607	1.61761
GRM8	1.70211	1.41558	1.98291
GSK3A	1.26945	1.70642	2.04881
GSK3B	0.982193	0.887613	1.11047
GSN	0.680134	0.638171	1.88408
GTF2A1	1.05369	1.04507	1.14622
GTF2A2	0.793595	1.1413	1.89357
GTF2B	0.956961	1.16805	1.51089
GTF2E1	0.975509	0.8589	1.5674
GTF2E2	0.731569	0.806679	1.54947
GTF2F1	0.632161	0.17646	0.932158
GTF2F2	0.941414	1.1995	1.23316
GTF2H1	0.97267	0.824814	1.54407
GTF2H2	1.82625	0.981439	1.90309
GTF2H3	0.935883	1.05775	1.15328
GTF2H4	0.356879	0.455873	0.607192
GTF2H5	0.85574	1.18371	0.847201
GYS1	1.54427	1.37295	2.06894
GYS2	0.895303	1.18397	1.18837
GZMB	2.38082	1.69629	2.38437
H3F3A	1.06231	1.29661	1.20829
H3F3B	1.11172	1.34571	1.41299
HACE1	1.38516	0.955435	2.52113
HAPLN1	1.42888	1.12608	1.95605
HAPLN2	1.1101	0.637184	1.20505
HAPLN3	1.23963	0.979276	2.03654
HAPLN4	1.34583	1.89451	0.845921
HAT1	1.48894	1.26547	1.44578
HBEGF	1.56618	1.53458	1.37044
HCK	1.28942	1.20004	1.21947
HDAC1	1.4102	1.66193	1.08905
HDAC10	1.17713	1.44818	1.66395
HDAC11	0.667661	2.11302	1.00972
HDAC2	1.55193	1.35086	1.69017
HDAC3	1.1435	1.78358	1.20565
HDAC4	1.02095	1.49981	0.869157
HDAC5	1.01332	2.39514	1.08815
HDAC6	1.03404	0.0991458	1.17354
HDAC7	0.750465	1.05467	0.96199
HDAC8	0.800606	1.20731	0.659152
HDAC9	0.767545	0.913349	1.16901
HDGF	1.07711	1.30911	1.12938
HECW1	1.90251	1.25507	0.707162
HECW2	1.04539	1.87048	0.796034
HELLS	0.87009	1.46349	0.928209
HGF	0.704958	0.909044	1.05537
HIF1A	0.796727	0.95048	0.969226
HIF1AN	1.11698	0.434398	4.00658
HIST1H3A	2.15614	0.632921	1.04475
HIST1H3B	1.14402	0.420425	1.36446
HIST1H3C	1.15875	0.97602	1.13214
HIST1H3D	1.16709	1.34316	0.827254
HIST1H3E	1.61859	2.00168	0.682651
HIST1H3F	1.72956	1.82287	0.638935
HIST1H3G	1.86581	1.06874	1.67329
HIST1H3H	1.01733	0.706259	1.26364
HIST1H3I	1.32289	1.53402	0.552157
HIST1H3J	1.35218	1.11273	1.57757
HIST3H3	1.04344	0.988062	1.15414
HLA-DMA	0.935194	0.981298	1.02313
HLA-DMB	0.676442	0.72439	0.988593
HLA-DOA	0.739528	0.612169	1.72165
HLA-DOB	1.02488	0.807818	1.48347
HLA-DPA1	1.41461	0.832073	1.42864
HLA-DQA1	1.37991	1.03511	1.65799
HLA-DQA2	1.09918	0.86433	1.64643
HLA-DQB1	1.17319	0.82464	1.3382
HLA-DRA	0.867507	1.39248	3.18649
HLA-DRB1	0.608588	0.969033	1.29908
HLA-DRB3	0.72986	1.15175	1.39084
HLA-DRB4	0.632895	0.521852	1.12902
HLA-DRB5	0.658097	1.07155	0.937932
HLTF	0.865666	1.1665	1.23257
HMGA1	0.345575	0.728779	1.04608
HMGN1	0.940362	1.31072	1.05459
HNF1A	1.05444	0.797939	2.08708
HNF1B	0.968412	0.724545	1.32431
HNF4A	1.18226	0.78508	1.48171
HRAS	1.21663	1.01901	1.15992
HRH4	1.30921	1.39397	2.30362
HRK	1.25022	1.14159	1.31876
HSP90AA1	1.19976	1.37137	1.21516
HSPA1A	0.870014	1.15849	0.817043
HSPA1B	1.56861	1.43111	1.64695
HSPB1	0.971286	1.10149	1.17112
HSPD1	1.42901	1.07994	1.39264
HSPG2	1.32901	1.0227	1.86137
HTRA2	1.47905	1.4997	1.35315
HTT	0.945767	1.91473	1.19254
HUWE1	0.887118	2.49949	1.41964
IFNA1	0.766887	1.78406	0.873045
IFNA10	0.854891	2.29031	0.907503
IFNA13	1.17588	1.11523	1.06969
IFNA14	0.937136	1.19459	1.13289
IFNA16	0.874306	1.6949	0.701325
IFNA17	0.870941	1.91229	0.466881
IFNA2	0.900594	1.29511	0.757286
IFNA21	1.03047	1.86243	0.780841
IFNA4	0.830234	1.48722	0.873553
IFNA5	0.480776	1.28049	1.65828
IFNA6	0.690798	1.76866	1.06203
IFNA7	0.727174	1.41761	0.83256
IFNA8	0.931529	1.03349	0.873123
IFNAR1	1.11435	1.30484	19.4169
IFNAR2	1.30494	0.984626	1.96472
IFNB1	2.26284	0.94911	2.80507
IFNG	1.42383	1.46363	1.73256
IFNGR1	2.18528	0.861413	1.55649
IFNGR2	1.61572	1.75282	1.66961
IGF1	1.43999	1.00729	1.32057
IGF1R	0.86485	0.853009	1.8368
IGF2	0.967307	0.971179	1.02917
IGF2-AS	1.24013	1.0105	1.75052
IGF2R	0.999871	0.969279	0.975872
IGFBP1	1.03206	0.849528	2.31135
IGFBP2	1.06527	0.920537	1.33118
IGFBP3	0.938504	0.732763	1.10589
IGFBP4	1.59294	1.42415	1.4008
IGFBP5	1.68287	1.31803	1.00322
IGFBP6	1.39144	1.43394	0.62826
IGFBP7	0.817675	0.916619	1.15815
IHH	0.674691	0.989699	1.70697
IKBKB	0.710233	1.06304	1.51583
IKBKE	0.812257	1.00061	1.417
IKBKG	0.528714	1.36444	0.591611
IL10	0.727663	1.0815	1.63949
IL10RA	0.914306	0.977504	2.23257
IL10RB	0.939865	1.09191	1.46773
IL11	1.12043	2.00182	1.3731
IL11RA	1.10269	1.36839	3.01477
IL12A	0.871673	1.6994	1.06212
IL12B	1.12641	1.58213	1.48745
IL12RB1	0.907132	0.883729	1.79473
IL12RB2	1.2845	0.988288	1.48702
IL13	1.49804	0.998774	1.43929
IL13RA1	1.72696	0.817761	2.40332
IL13RA2	1.23756	1.14942	0.821063
IL15	1.68067	0.895382	1.165
IL15RA	1.27299	0.922881	2.13952
IL16	1.01895	1.29127	2.0156
IL17A	2.55247	2.62695	1.13476
IL17B	1.08314	1.09843	1.27669
IL17C	1.06547	1.35529	2.37968
IL17D	0.971552	1.69267	1.65255
IL17RA	1.05956	0.966661	1.9645
IL17RC	1.49529	1.54742	1.30222
IL18	0.695993	1.11437	1.57949
IL18R1	1.20848	1.36461	1.2633
IL19	0.981777	1.06376	0.907506
IL1A	1.14615	1.87697	1.08605
IL1B	1.49523	1.17985	1.42849
IL1R1	0.737309	1.68684	0.889566
IL1R2	0.567305	1.3918	1.28039
IL2	1.21957	1.66584	0.904815
IL20	0.965048	1.06537	0.941862
IL20RA	0.834056	0.955471	1.21771
IL21	0.897225	1.21004	0.779668
IL22	0.803852	0.991515	1.16232
IL22RA1	0.756347	1.7449	1.21243
IL22RA2	0.995349	0.333119	4.55871
IL23A	0.757981	0.431576	1.74097
IL23R	1.2678	0.896421	1.32317
IL24	1.57987	0.679352	2.53522
IL26	1.59578	1.29357	1.28811
IL2RA	1.18436	0.888992	1.16694
IL2RB	0.811262	0.80771	1.42736
IL2RG	0.965928	0.894488	2.2015
IL3	1.02657	0.684042	0.94366
IL3RA	1.34393	1.31026	1.96833
IL4	0.817809	0.682022	1.82447
IL4R	0.971584	0.969077	0.89683
IL5	0.893966	0.712949	2.00267
IL5RA	1.27889	1.45452	1.38457
IL6	1.03277	1.35011	1.19693
IL6R	1.2368	2.21935	1.91974
IL6ST	1.83476	1.11289	1.85466
IL7	0.979873	1.14963	1.48172
IL7R	0.794331	0.899581	1.6869
IL9	0.897437	0.955819	1.51302
IL9R	1.02834	0.904138	0.5882
ILK	1.01677	1.10922	0.877915
IMPG1	0.912193	0.648804	0.96418
ING2	0.745226	1.12036	1.87578
INS	0.432744	0.720855	1.37169
INSR	0.191862	1.5862	0.0884508
INSRR	0.862129	1.02313	1.80742
IRAK1	0.966985	0.905887	1.59747
IRAK2	1.39153	1.35466	2.85627
IRAK3	0.694246	1.14404	1.23117
IRAK4	1.21798	0.813668	1.36889
IRF9	1.86904	1.66008	1.64344
IRS1	1.75242	0.808788	2.18656
IRS2	1.17649	0.919201	0.924692
IRS4	1.20631	1.08622	0.917853
ITCH	0.717887	1.13281	1.075
ITGA1	1.51896	1.1348	0.813205
ITGA10	1.15515	1.14723	1.13395
ITGA11	0.974234	0.856215	1.07726
ITGA2	1.49576	1.81538	1.31692
ITGA2B	0.820154	1.67571	0.822902
ITGA3	0.720409	0.916131	1.61566
ITGA4	1.07226	1.58022	1.18731
ITGA5	1.22897	1.20537	1.07907
ITGA6	1.13913	1.2949	1.34933
ITGA7	1.21317	1.10796	1.10746
ITGA8	0.792112	1.86083	1.34033
ITGA9	1.23807	1.86939	1.08245
ITGAD	0.583383	1.74167	0.783279
ITGAE	0.59529	0.876348	1.55852
ITGAL	0.617522	1.1392	1.55196
ITGAM	0.608406	0.0525311	0.762874
ITGAV	1.096	1.57163	0.815762
ITGAX	1.01282	1.15549	0.743483
ITGB1	0.534067	1.438	1.73489
ITGB2	0.617447	1.46549	1.96427
ITGB3	0.836259	0.617233	2.90708
ITGB4	0.923987	0.968253	0.770153
ITGB5	0.629092	0.527186	1.67864
ITGB7	0.645351	0.483407	1.68626
ITGB8	1.17487	1.0533	1.7603
ITK	1.50914	0.563569	1.2438
ITPR1	0.671102	0.832073	1.03624
ITPR2	0.654747	0.959376	1.10476
ITPR3	1.26517	0.978982	0.858538
JAK1	0.964795	0.696398	1.11152
JAK2	1.09297	0.584982	1.63036
JAK3	1.56376	1.05864	1.88181
JUN	1.35419	0.98761	1.28713
JUNB	1.37125	1.35235	1.44641
JUND	1.19603	1.7686	2.20926
KAT2B	0.961973	1.28238	1.392
KCMF1	1.30662	1.36462	1.33876
KCNK1	0.768507	0.946084	0.993036
KCNK10	0.849328	0.796073	1.39535
KCNK12	0.82377	0.82808	0.989556
KCNK13	1.01534	1.57608	2.57348
KCNK15	0.887329	1.2296	1.24427
KCNK16	0.805391	1.16997	1.49048
KCNK17	0.778585	1.24685	2.21803
KCNK2	1.18881	1.09378	2.66953
KCNK3	0.985161	0.694298	1.39762
KCNK4	1.13276	0.989313	1.57105
KCNK5	1.00649	0.952836	2.19923
KCNK6	0.913682	1.13445	2.16865
KCNK7	1.69751	1.19856	1.69348
KCNRG	1.36377	0.770469	0.865176
KCNT1	0.994829	0.938282	1.87282
KCNT2	1.74194	0.887537	1.72669
KCNU1	1.31198	0.957949	1.01166
KCNV1	0.979947	4.03606	0.770512
KCNV2	1.7251	1.97015	1.1447
KCTD1	1.22224	1.2004	0.982774
KCTD11	2.02541	1.08409	2.82971
KCTD12	1.66219	1.89687	1.75779
KCTD13	1.14255	1.32725	0.8982
KCTD14	0.738867	1.13563	0.967496
KCTD15	1.02196	0.749059	1.9572
KCTD2	0.904684	1.67164	1.28783
KCTD3	0.707596	1.50613	0.764382
KCTD4	1.04251	1.88995	1.18451
KCTD5	1.39828	1.80509	1.04522
KCTD6	0.628463	1.52966	1.63964
KCTD7	0.678957	1.48321	1.51511
KCTD8	0.483508	1.44971	1.7344
KCTD9	0.863039	2.39181	1.12298
KDELR1	0.595915	1.6324	1.05576
KDELR2	0.643233	1.13028	0.684235
KDELR3	0.804844	1.17086	0.868866
KDR	1.03202	1.15722	0.750252
KIT	0.941543	1.4029	0.63313
KITLG	0.694157	1.34419	1.81434
KLF10	0.563547	0.34258	1.54087
KNDC1	0.757584	0.465728	1.75373
KPNA1	1.0709	0.939134	1.48809
KRAS	0.968885	0.838827	1.34427
KREMEN1	0.857238	0.574056	1.5496
KREMEN2	0.973653	1.00232	0.666859
LAMA1	0.92542	0.998386	0.775721
LAMA2	1.08408	0.953786	1.03934
LAMA3	1.00679	0.995816	0.839281
LAMA4	1.00791	0.874814	0.747686
LAMA5	1.17989	1.0682	0.273566
LAMB1	1.63146	1.63534	1.45272
LAMB2	0.975917	1.17857	1.7484
LAMB3	1.32745	0.940224	1.79012
LAMB4	1.03228	1.10894	1.54663
LAMC1	0.61397	0.6665	0.704412
LAMC2	0.978881	0.989585	1.05967
LAMC3	1.09123	1.04849	0.852277
LAMTOR3	0.577931	0.913825	0.679541
LAT	0.850683	0.62462	1.10552
LCK	1.02895	1.2084	1.51085
LCP1	1.15851	1.40147	0.992172
LCP2	1.28912	1.197	1.19207
LEF1	1.10381	0.915244	1.99164
LEFTY1	0.668296	0.721162	2.44791
LEFTY2	0.730396	0.742589	1.57392
LFNG	1.61998	1.75246	3.36025
LHB	1.45691	1.05334	3.42877
LIF	0.461513	0.607682	0.990661
LIFR	1.37355	1.12037	1.94138
LIMK2	1.84762	1.28045	2.59149
LIMS1	1.20821	1.22104	1.67161
LIMS2	2.34544	2.00132	1.20475
LIPE	1.01951	1.3069	0.959127
LIPF	0.748349	0.84241	0.739472
LMNA	1.09205	1.02081	0.962293
LMNB1	1.32292	1.39322	1.24472
LMNB2	0.880463	1.0665	0.678744
LMTK2	1.22627	1.45341	1.60184
LMTK3	1.06337	1.70636	0.875284
LPIN1	1.03826	1.22483	2.4634
LPL	1.18395	1.17635	1.59202
LRP5	1.17003	1.13382	0.864449
LRP6	0.595211	2.26092	1.76771
LTA	0.862982	1.08613	1.2822
LTBP1	0.780694	2.27251	1.60149
LTBP2	0.731656	2.04851	0.796778
LTBP3	0.615331	1.20305	1.39584
LTBP4	0.8879	0.836507	0.80609
LY96	0.642069	1.39649	0.47662
MAML1	0.771944	0.960782	0.643039
MAML2	0.71417	1.09514	0.702056
MAML3	0.511099	1.38557	0.994017
MAP1A	0.711638	0.18444	1.98501
MAP1B	0.705869	0.473055	1.53086
MAP2	0.710775	0.467796	1.14516
MAP2K1	0.925482	1.02487	1.80329
MAP2K2	0.794492	0.971129	2.45511
MAP2K3	1.1855	1.09786	1.37042
MAP2K4	0.820571	0.778942	1.58956
MAP2K5	1.11153	0.781101	1.78501
MAP2K6	1.05315	0.76473	1.39768
MAP2K7	1.07172	1.07116	0.968499
MAP3K1	0.775301	0.552273	0.916748
MAP3K10	1.10867	1.12508	1.62015
MAP3K11	0.96373	2.16465	1.2422
MAP3K12	2.28391	2.91747	1.09679
MAP3K13	1.41376	1.01592	1.37539
MAP3K14	1.20004	1.03867	1.37805
MAP3K2	1.08097	1.31059	1.64631
MAP3K3	1.05536	0.92443	0.974661
MAP3K4	1.04763	0.786024	1.05823
MAP3K5	0.613868	0.771778	0.792631
MAP3K6	0.931245	0.988656	0.968988
MAP3K7	0.940029	0.955764	0.909474
MAP3K8	0.57755	0.812714	0.900634
MAP3K9	0.56002	0.73377	0.907766
MAP4	0.67602	0.749911	1.13463
MAP4K1	0.832353	0.870873	2.03859
MAP4K2	1.08419	1.05301	1.35934
MAP4K3	0.892804	0.9759	1.78601
MAP4K4	1.53253	1.30251	1.92875
MAP4K5	1.57605	1.16068	1.47696
MAPK1	0.790506	1.50559	1.20381
MAPK10	1.29776	1.03839	1.24038
MAPK11	1.67311	1.5584	1.21141
MAPK12	0.990256	0.928496	2.2748
MAPK13	1.07921	1.13673	1.83792
MAPK14	0.946082	1.66979	1.60818
MAPK3	1.20039	1.37649	1.28569
MAPK4	1.20013	1.1568	1.36506
MAPK6	0.867184	1.21157	1.00189
MAPK7	1.17683	1.51313	2.52067
MAPK8	1.3439	1.17673	1.89449
MAPK8IP1	1.12285	0.760214	1.88916
MAPK8IP2	1.06484	1.33203	1.89774
MAPK8IP3	1.00093	1.92425	1.17244
MAPK9	0.883028	1.57878	1.31167
MAPKAPK2	1.10203	0.924766	1.44205
MAPKAPK3	0.686212	1.13084	1.31548
MAPKAPK5	0.916633	0.835292	1.0338
MAPT	0.739118	1.41932	1.14304
MARCO	1.00197	2.16882	0.887985
MAST2	0.94464	1.38272	0.861411
MCF2L	0.608903	1.17288	0.82204
MCL1	0.598331	0.962072	0.556464
MCM5	0.837433	0.976815	0.829293
MCRS1	0.977516	1.14761	1.0057
MDK	0.326055	0.593154	1.19042
MDM2	0.865036	0.590086	1.30483
MED1	0.938126	0.667091	0.987936
MEF2A	0.799465	0.926912	0.84747
MEF2B	0.64408	0.643776	1.76804
MEF2C	1.06742	0.920423	1.559
MEF2D	1.28524	1.09887	1.57223
MEP1B	1.04209	0.657621	2.11611
MEPE	0.790053	0.997716	1.05567
MERTK	0.954551	0.999448	0.815931
MET	1.01836	0.50334	1.26886
MFNG	1.03262	1.03584	2.04499
MITF	1.01916	0.701125	1.57976
MKNK1	0.669128	0.659346	2.55022
MKNK2	0.719259	0.834424	2.14312
MLH1	0.832369	0.827228	1.34376
MLLT4	1.30208	1.2292	1.53075
MLST8	0.616536	1.06863	1.03283
MMP1	0.539859	0.610742	2.09125
MMP10	1.50487	1.23975	1.35378
MMP11	0.616881	0.744037	1.24045
MMP12	0.655247	0.720178	0.596668
MMP13	1.02519	1.09674	0.586796
MMP14	1.07857	0.953377	1.26243
MMP15	0.794354	0.609855	1.21506
MMP16	0.806285	0.879796	1.18724
MMP17	0.694494	0.602282	0.903005
MMP19	0.800363	0.745089	1.3276
MMP2	0.941333	0.980655	0.803338
MMP20	1.05186	0.866514	1.07243
MMP21	1.49426	1.19299	1.51629
MMP23A	1.39503	0.951714	1.64885
MMP23B	0.865946	0.716372	1.55781
MMP24	0.873848	1.00411	1.80282
MMP25	1.5398	1.04501	0.966377
MMP26	2.95862	1.06013	1.37082
MMP27	1.35064	1.38094	1.81142
MMP28	1.30476	1.23694	1.02656
MMP3	0.940462	1.24102	0.996577
MMP7	0.884368	0.970669	1.48372
MMP8	0.709907	1.61391	0.82456
MMP9	1.00286	1.69356	1.61049
MMRN2	1.03228	0.950979	1.98778
MPL	0.155696	1.69407	1.21257
MRAS	1.36007	1.33283	1.7431
MRC1	1.0861	1.56982	0.83806
MRC2	0.825477	0.858035	1.27675
MRGPRF	0.85674	1.30519	2.05446
MS4A1	0.922603	1.43368	1.11005
MSH2	0.793077	0.947279	1.03479
MSH6	0.792863	1.76994	0.816058
MST1R	0.687228	1.05308	0.9232
MTOR	0.566066	1.80643	0.709209
MUC1	0.682726	1.5591	0.933661
MUSK	0.648056	1.17041	0.646272
MYC	1.05605	1.22221	0.848291
MYD88	0.423546	1.04542	0.779962
MYH10	1.48858	1.04623	0.982563
MYH11	0.924917	0.960291	0.786215
MYH13	0.677864	0.60986	0.755203
MYH14	1.00233	0.589082	1.43798
MYH15	1.01412	0.705281	1.04031
MYH16	0.627911	0.546915	1.49446
MYH2	0.916834	0.684722	1.24528
MYH3	0.770315	0.447446	1.37016
MYH4	1.54924	0.734077	0.921516
MYH6	1.74345	0.905009	0.891574
MYH7	0.883093	0.722259	1.20468
MYH7B	0.701349	0.692664	1.18225
MYH8	0.52395	0.679429	2.25944
MYH9	0.794811	1.26621	1.56965
MYL1	0.978016	0.940681	1.10458
MYL12A	1.08697	1.17854	0.917899
MYL12B	1.28983	1.28037	1.74246
MYL2	0.717826	0.734477	2.12994
MYL3	0.629022	0.694409	0.92034
MYL4	0.852374	0.759694	1.59478
MYL5	0.717588	0.843711	1.28552
MYL6	0.68373	1.06787	1.567
MYL7	0.671596	0.606622	1.13448
MYL9	1.28107	1.13195	1.19287
MYLK	1.17853	1.34806	1.32059
MYLPF	1.02414	0.835734	1.17495
MYO10	1.43381	1.23064	1.11829
MYO15A	1.04154	1.23577	1.05193
MYO18B	1.25088	0.990908	1.01687
MYO1A	0.858069	1.01991	1.50348
MYO1B	1.30725	0.813109	1.87724
MYO1C	1.15521	0.9982	1.73609
MYO1D	1.02239	1.65833	2.66329
MYO1E	1.64012	1.60641	1.64467
MYO1F	1.15514	1.21067	1.15706
MYO1G	1.74809	1.19368	1.08774
MYO3A	0.642486	0.809142	1.25064
MYO3B	0.913405	1.21045	0.955232
MYO5A	1.53329	1.6684	1.6762
MYO6	1.19273	1.70538	1.06131
MYO7A	0.95521	1.95745	1.2469
MYO9A	1.22221	1.32734	1.15007
MYO9B	1.11597	1.40363	1.30524
NAA10	0.945167	0.980415	0.994081
NACA	1.02564	1.2447	0.815574
NAT1	1.12275	1.37605	1.33672
NCAN	1.09993	1.80552	2.40329
NCK1	1.45992	1.82083	0.968971
NCK2	0.723816	1.14015	0.904927
NCOA1	0.765368	0.822888	1.20412
NCOA2	0.690305	0.969333	0.98939
NCOA3	0.610295	0.954205	0.375009
NCOA7	0.942795	1.9708	0.554203
NCOR1	0.948207	1.78856	0.643325
NCOR2	0.676598	0.915676	0.844746
NCSTN	0.459392	0.927177	0.995108
NEDD8	0.315991	0.609865	2.54262
NET1	0.582423	0.380167	1.20571
NFAT5	0.985321	0.932147	0.944821
NFATC1	1.23648	0.794974	1.20383
NFATC2	0.986694	0.563266	2.01902
NFATC3	0.671846	0.438748	1.84079
NFATC4	1.02655	0.934925	0.85876
NFE2L1	0.939757	0.756351	1.61909
NFE2L2	1.32781	1.3982	1.55751
NFKB1	1.1019	1.4401	1.46781
NFKB2	1.10427	0.880218	1.79574
NFKBIA	1.20133	1.22035	2.10689
NFKBIB	0.797968	0.928009	1.68455
NFKBIE	1.22937	1.34665	1.10924
NGF	0.860537	0.529841	1.28819
NGFR	3.49481	3.79067	3.35439
NOS3	0.974586	0.633031	1.21996
NOTCH1	0.819609	0.395031	0.550585
NOTCH2	0.718814	0.901199	0.680741
NOTCH3	0.874046	0.891194	0.957808
NOTCH4	0.833582	0.54522	0.676595
NOV	1.5879	0.730778	1.37566
NPC1	0.62184	0.789226	1.66511
NPC2	1.02454	1.37835	1.67987
NPTN	1.46143	1.33608	0.848461
NQO2	0.695492	0.813332	0.891927
NR0B1	1.00698	0.995133	0.912868
NR0B2	0.922451	0.842387	1.18231
NR2F1	0.991634	0.949417	0.948571
NR3C1	0.67559	0.681387	1.1474
NRAS	1.07276	1.02869	1.45933
NRG1	1.27968	0.836676	1.03423
NRG2	1.03608	0.923311	0.952664
NRG4	1.22483	1.14649	1.01199
NRIP1	0.988563	0.938022	1.10493
NRP1	1.11315	1.03195	1.41282
NRP2	1.03858	0.862117	2.20416
NTF3	1.16172	1.50553	1.4967
NTF4	1.10295	1.23241	1.29494
NTN1	1.24232	1.25906	1.56356
NTRK1	0.877586	1.12751	1.1453
NTRK2	0.86594	0.887809	1.24457
NTRK3	1.13951	1.14654	1.34936
NUDT6	1.11799	1.08577	1.58571
OGFR	0.835288	1.03012	0.997709
OGN	1.85933	2.06865	0.973567
OSM	1.25132	1.36894	1.46267
OSMR	1.20239	1.57732	0.713706
PAK1	0.622487	0.85648	1.50628
PAK1IP1	0.975202	1.03364	0.810767
PAK2	0.771067	0.592357	0.53555
PAK3	0.744031	0.849848	0.777173
PAK4	0.867986	1.19327	0.754657
PAK6	0.787829	2.17829	0.68076
PAK7	0.713823	1.1714	0.749057
PAN2	0.833577	1.30928	0.513718
PARP1	0.774932	2.06733	6.93175
PARP10	0.558376	0.561216	1.4328
PARP11	0.711995	0.553749	1.56733
PARP14	1.10624	0.902287	1.45229
PARP15	0.908907	1.09776	1.44188
PARP16	1.10981	0.638249	1.24798
PARP2	1.01051	0.746067	1.16993
PARP3	1.03748	0.795955	0.973811
PARP4	1.18343	0.762275	1.95966
PARP6	1.27711	0.89939	1.15844
PARP8	0.835968	0.848369	1.84975
PARP9	1.21743	0.879778	0.589999
PARVA	0.922663	0.892376	1.20924
PARVB	0.811819	1.00485	2.19552
PAX6	1.1598	1.05873	1.39506
PCDHGA12	0.970268	0.998628	0.937611
PCNA	1.11562	0.751646	0.604505
PDCD4	1.86072	1.17185	1.46934
PDE3B	0.922644	1.12839	0.837915
PDGFA	0.873015	0.959068	1.27504
PDGFB	1.14651	0.994539	1.09745
PDGFC	0.798779	0.500425	0.63495
PDGFD	0.859263	0.906016	1.58381
PDGFRA	1.40493	0.924687	1.3611
PDGFRB	1.30109	1.5329	1.37114
PDK1	0.956145	0.903992	1.17575
PDK2	1.11644	0.974504	1.20326
PDK3	1.02843	0.713878	1.22567
PDPK1	1.35648	1.24403	2.49015
PELP1	1.12622	0.821081	1.42506
PENK	1.639	0.969274	2.1455
PER1	1.78385	1.32392	1.6089
PER2	0.79223	1.49337	1.26429
PER3	1.26098	1.16762	0.813928
PF4	0.976758	1.71704	0.599133
PF4V1	0.887912	1.45509	0.993352
PFKFB3	1.40406	1.28777	1.62256
PFKM	1.36456	1.49669	1.24876
PGF	0.989985	1.21323	1.0707
PGR	1.72761	1.73319	1.28022
PHB2	1.09578	0.898105	0.993412
PHKA1	1.27718	0.949603	1.55213
PHKA2	1.50576	1.24651	0.763263
PHKB	0.742014	0.59674	1.51715
PHKG1	1.42417	1.39115	0.750804
PHKG2	0.946266	1.03032	1.23377
PHLPP1	1.20774	1.0675	0.525929
PIAS1	0.801728	0.939744	0.797949
PIAS2	0.787701	0.912496	1.30738
PIAS3	0.658152	0.864281	0.884932
PIAS4	0.675421	1.04242	0.751765
PIDD1	0.542748	0.810271	0.833682
PIK3C2A	0.77467	0.568351	0.56823
PIK3C2B	1.46342	0.643941	1.98292
PIK3C2G	1.18292	0.969124	1.67178
PIK3C3	0.950039	0.910923	1.95453
PIK3CA	1.35297	0.994842	1.61215
PIK3CB	1.10792	0.687098	1.21757
PIK3CG	0.843343	0.491352	0.907179
PIK3R1	0.906817	0.922935	0.802043
PIK3R2	1.00837	0.551587	0.717569
PIK3R3	0.90843	0.986212	0.668925
PIK3R4	1.20199	0.666519	1.34797
PIK3R5	1.56451	0.815952	0.771548
PIK3R6	1.01813	1.04308	0.653525
PIM1	1.2888	0.795239	0.741832
PIM3	0.726453	1.05805	0.503845
PIN1	0.946217	0.7073	0.722612
PKIA	0.866309	1.07291	0.833862
PKIB	1.17975	0.75378	1.24791
PKIG	0.770084	0.851312	1.36448
PLA2G10	0.838835	0.585565	0.791399
PLA2G12A	0.912614	1.0245	0.7988
PLA2G12B	0.80504	0.866679	1.00283
PLA2G1B	1.00267	0.73704	1.65642
PLA2G2A	0.801686	0.832133	1.57386
PLA2G2D	0.84111	0.724156	1.15799
PLA2G2E	1.34943	1.10731	0.842315
PLA2G2F	1.2387	1.14064	0.80792
PLA2G3	0.920126	0.950709	0.390296
PLA2G4A	0.987059	1.28698	0.823973
PLA2G4C	1.08362	1.47061	0.916038
PLA2G4D	0.818021	1.06828	1.83197
PLA2G4F	0.726106	0.999828	1.30465
PLA2G5	1.66037	0.899066	1.30837
PLA2G6	1.243	1.11293	0.863766
PLA2G7	1.15245	1.64837	1.54146
PLCB1	2.37533	1.91117	1.68567
PLCB2	1.24778	3.27369	1.954
PLCB3	1.02116	1.32571	1.07846
PLCB4	0.953066	1.48254	1.44422
PLCD1	1.3931	1.34431	1.06113
PLCD3	1.37046	1.22481	1.84193
PLCD4	1.27079	1.08975	1.58226
PLCE1	1.77163	0.893965	1.92168
PLCG1	1.25058	0.996819	1.20493
PLCG2	1.38197	1.12073	1.08723
PLCH1	1.30351	1.3221	1.10268
PLCH2	1.17187	0.955154	0.911056
PLCZ1	1.4644	1.75796	0.744492
PLD1	1.17077	1.65156	0.45363
PLD2	1.06132	1.07832	0.669622
PLD3	0.985826	1.0132	0.541323
PLK1	1.19842	1.10326	0.992153
PLN	0.82221	0.792736	0.920954
PLS1	0.685197	0.902571	0.347361
PLS3	0.610326	0.677996	0.443959
PMAIP1	0.846632	0.686175	0.593822
PML	0.912314	0.99237	0.693428
PMS2	3.8286	2.20402	7.39088
PNLIP	1.45556	1.07535	1.44793
POLA1	1.35478	1.27816	1.21327
POLD1	1.131	0.934106	1.0257
POLDIP3	1.304	0.809913	0.901378
POLE	1.56347	1.26823	1.33058
POLR1A	0.925258	0.572891	1.1763
POLR1B	1.08494	0.639567	1.54484
POLR1C	0.981158	0.839264	1.2522
POLR1D	1.27233	0.793757	1.2742
POLR1E	1.42987	1.41371	0.961339
POLR2A	1.11663	1.07784	0.787514
POLR2B	1.30805	0.912046	0.765439
POLR2C	1.70916	1.31285	1.19069
POLR3D	0.908473	0.75364	0.891388
POLR3F	0.957715	0.932574	1.39312
POLR3K	1.4073	1.27524	1.2752
POU2F1	0.766784	0.649609	1.24751
PPAP2B	1.06912	0.883844	1.24197
PPARA	0.715131	0.624478	1.53616
PPARD	0.80791	0.804278	0.905436
PPARG	1.50862	0.967356	2.01065
PPARGC1A	0.870814	0.711907	0.829439
PPBP	1.07655	1.111	0.961594
PPP1CB	1.01064	0.997589	0.857362
PPP1R10	1.1291	0.952169	1.27547
PPP1R11	0.866234	0.746076	1.38269
PPP1R12A	1.94557	1.12713	1.15413
PPP1R12B	1.31965	0.990289	0.950924
PPP1R12C	0.718918	0.758246	1.36272
PPP1R13B	0.82136	0.681248	1.28457
PPP1R14A	1.08546	0.839132	1.42743
PPP1R14B	1.18125	1.00967	0.859009
PPP1R15A	1.2421	1.09154	1.30236
PPP1R16A	1.02522	1.27526	1.20647
PPP1R1A	1.20846	1.56854	1.8874
PPP1R1B	1.57175	1.08144	1.81678
PPP1R2	1.70389	1.38123	0.793411
PPP1R3A	2.39876	2.10837	1.64891
PPP1R3B	1.53132	1.45132	1.42889
PPP1R3C	1.93081	1.08386	0.937233
PPP1R3D	1.03058	0.892433	0.813163
PPP1R3F	1.06384	0.678013	1.33297
PPP1R7	1.24059	1.76998	0.889459
PPP1R8	1.10694	0.645881	1.26025
PPP1R9A	1.43451	1.29626	0.805443
PPP1R9B	1.26794	1.29148	0.722788
PPP2CA	1.1647	1.69093	0.873274
PPP2CB	0.826293	0.950107	0.857053
PPP2R1A	0.69376	1.10095	0.635941
PPP2R1B	0.766657	0.7326	0.597208
PPP2R2A	0.886998	1.04528	1.19571
PPP2R2C	1.05747	1.29663	0.586418
PPP2R3A	0.80141	0.822999	0.545724
PPP2R3B	0.742599	0.575366	0.580253
PPP2R4	0.624909	0.416806	1.09875
PPP2R5A	1.87885	0.898377	2.7295
PPP2R5B	1.48782	1.16296	0.866735
PPP2R5C	1.1345	0.367887	1.4721
PPP2R5D	0.658942	0.546111	0.897545
PPP2R5E	1.05755	0.725854	1.18709
PPP3CA	1.62438	1.08915	1.32833
PPP3CB	0.972775	0.466358	1.38974
PPP3CC	0.711846	0.559019	0.895536
PPP3R1	0.788143	0.774934	0.890905
PPP3R2	0.948799	1.08258	1.18013
PREX1	0.88471	0.883101	0.955549
PRF1	1.70401	1.23528	1.61999
PRG2	1.10587	0.737145	0.829169
PRG4	1.2445	1.43648	0.492276
PRKAA1	1.20225	1.39036	1.16547
PRKAA2	0.831472	1.01532	1.02941
PRKAB1	0.817022	0.737974	0.846836
PRKAB2	0.845503	1.00303	0.680227
PRKACA	0.916766	0.556068	0.927111
PRKACB	0.80306	0.694706	0.705967
PRKACG	1.00017	0.732603	1.49751
PRKAG1	1.0603	0.557541	0.77371
PRKAG2	0.785387	0.678044	1.15254
PRKAG3	0.93018	0.559636	0.896093
PRKAR1A	0.845564	0.953327	0.884746
PRKAR1B	0.904291	0.807215	0.756985
PRKAR2A	1.85519	1.10564	0.459362
PRKAR2B	1.3406	1.202	1.03023
PRKCA	1.1785	0.898458	1.33183
PRKCB	1.18625	0.959575	1.19598
PRKCD	1.01609	1.00711	1.1321
PRKCE	0.833101	1.01174	0.668728
PRKCG	0.83909	1.22411	0.594933
PRKCH	0.927074	0.913283	1.11492
PRKCI	1.38402	1.21497	0.820565
PRKCQ	1.61169	1.38048	1.35507
PRKCZ	2.31287	2.42782	3.41388
PRKD1	1.29501	1.94019	0.191989
PRKD3	1.18885	1.18412	1.57394
PRKDC	1.14716	1.06734	1.60944
PRL	1.09003	0.945497	0.68094
PRLR	1.09086	0.75245	1.02075
PROK1	1.25587	1.68058	0.710839
PRPS1	1.10416	0.832696	1.28708
PSEN1	1.28276	1.47611	0.64206
PSEN2	1.10873	1.34842	0.72674
PSENEN	1.15723	0.94254	0.963993
PSIP1	0.895369	0.964747	0.978217
PSMA1	0.94829	0.95362	0.769774
PSMA2	0.738705	1.30962	0.393212
PSMA3	0.934111	0.847002	0.62148
PSMA4	1.00464	1.29453	0.485944
PSMA5	1.0917	0.71644	0.530655
PSMA6	0.958298	0.675861	0.440432
PSMA7	0.625541	0.534114	0.717601
PSMA8	0.886723	0.725215	0.781406
PSMB1	1.48641	1.09431	1.07409
PSMB10	1.11185	0.850201	1.49904
PSMB2	0.848307	0.70867	0.856651
PSMB3	1.32971	0.717137	0.984836
PSMB4	1.07047	0.752111	0.943034
PSMB5	1.41593	0.960663	0.800258
PSMB6	1.19597	1.00103	0.907849
PSMB7	1.05551	0.834539	1.19797
PSMB8	1.06184	0.729747	1.39963
PSMB9	0.90094	1.04316	1.30827
PSMC1	1.05482	0.785527	1.28373
PSMC2	0.939683	0.941464	1.3917
PSMC3	1.40561	1.24726	0.787065
PSMC4	0.815751	0.711058	1.41163
PSMC5	1.1046	1.33998	1.14452
PSMC6	0.994129	0.694051	1.17177
PSMD1	0.700975	0.835672	1.76707
PSMD2	0.504798	0.822945	0.800337
PSMD3	1.00376	0.903149	0.96755
PSMD4	0.678624	0.591389	1.34902
PSMD5	1.31168	1.13806	1.07033
PSMD6	0.723738	0.847711	1.2515
PSMD7	0.968701	0.902589	1.02678
PTCH1	1.04746	1.02179	0.97075
PTCH2	0.899033	0.931656	0.904298
PTEN	0.865844	0.967626	0.751518
PTGES3	0.773711	0.930168	0.946376
PTGS1	0.970724	0.961016	1.0057
PTGS2	1.16002	1.07432	2.16163
PTK2	1.06418	1.2091	0.821305
PTK2B	0.796162	0.744871	1.34718
PTK6	0.81338	1.81842	0.49981
PTK7	1.24287	1.15152	0.575374
PTN	1.12592	1.84612	0.609828
PTPN1	1.38671	1.48601	1.17041
PTPN11	1.14508	1.68441	0.819517
PTPN2	1.22663	1.44771	0.829839
PTPN3	1.35006	1.74829	1.26542
PTPN6	1.29845	1.09374	1.38804
PTPRA	0.982753	0.900304	1.0106
PTPRB	1.16744	1.00273	0.929303
PTPRC	1.08023	0.887433	0.690422
PVRL1	0.909812	1.02931	1.194
PVRL2	0.995123	0.947401	0.611852
PVRL3	1.31781	1.32314	0.362673
PVRL4	0.941145	1.58756	0.494235
PXN	1.09716	1.03981	0.492731
PYGB	0.860602	1.29314	0.482252
PYGL	1.1121	1.02654	0.587593
PYGM	0.663399	0.850003	0.765846
PYGO1	0.826639	0.958052	0.718795
PYGO2	0.889594	0.470834	0.928213
RAB5A	1.19882	0.938375	0.687269
RAC1	0.994664	0.932906	0.683587
RAC2	0.663637	0.638253	0.653249
RAC3	1.1683	0.65253	1.04436
RAD51	1.04195	0.529331	1.06617
RAD51B	0.930134	0.599669	1.36464
RAD51C	1.18549	1.07044	0.819844
RAD51D	0.767425	0.549905	1.34739
RAF1	1.19281	0.739193	1.02151
RALA	1.10519	0.846643	1.17285
RALB	0.88099	0.6008	1.14894
RALBP1	0.923525	0.794861	1.24484
RALGDS	0.771898	0.429056	1.2287
RAN	1.19317	1.16761	1.25049
RAP1A	0.960691	2.01361	0.858255
RAP1B	0.972775	0.957132	0.623279
RAP2A	0.844932	1.41398	1.25981
RAPGEF1	1.00528	0.892663	0.942298
RAPGEF3	0.92485	0.84174	1.44498
RAPGEF4	1.12794	1.53662	1.479
RASA1	0.812647	0.720186	1.92477
RASA2	0.623484	0.511281	0.703124
RASA3	1.17285	1.08612	0.564772
RASGEF1A	1.09506	1.25985	1.08015
RASGEF1B	0.980157	0.994198	1.47631
RASGEF1C	0.926519	0.953729	0.976375
RASGRF1	0.805572	0.870095	1.02494
RASGRF2	0.744378	1.04328	0.831409
RASGRP1	1.13634	0.771871	0.637108
RASGRP2	0.787339	0.771093	1.03703
RASGRP3	1.34408	0.915125	0.864801
RASGRP4	1.04995	0.928829	1.72359
RB1	1.02731	1.03263	0.728641
RB1CC1	1.22432	1.01928	1.14497
RBPJ	0.679273	0.87035	0.676391
RBX1	1.05329	0.889322	0.791466
REL	1.17236	1.14026	1.40794
RELA	1.1347	0.921935	1.10554
RELB	1.24163	0.971575	1.17209
RET	1.02284	0.89203	1.31178
RFC2	1.08489	1.06167	0.699465
RFC3	1.2461	0.964616	1.20983
RFC4	1.32036	1.34599	0.769198
RFC5	1.05386	1.11211	0.752832
RFNG	1.15529	1.04727	1.16904
RGS1	1.17101	1.1514	0.646784
RGS10	0.771358	1.25811	0.574646
RGS11	0.955899	0.95256	0.772866
RGS12	0.797585	0.874595	0.775665
RGS13	1.0201	1.51732	0.306732
RGS14	0.83814	0.882518	0.758877
RGS16	1.19931	0.831195	0.53138
RGS17	0.81124	1.1525	0.467872
RGS18	0.990709	1.21267	0.440918
RGS19	0.938205	0.422361	0.523092
RGS2	1.07601	1.16311	0.888106
RGS20	0.570164	0.349279	0.798192
RGS21	1.88878	0.673568	0.939744
RGS22	0.936976	0.447589	0.999928
RGS3	0.98023	0.554126	1.91176
RGS4	0.90341	0.852477	0.921146
RGS5	1.13233	1.11866	0.795153
RGS6	0.896499	1.0147	0.770018
RGS7	1.52945	0.719322	0.998813
RGS8	1.16828	0.914415	0.944853
RGS9	1.62423	0.544217	0.915326
RHEB	1.21639	1.19095	0.946949
RHOA	1.05059	0.902399	0.834069
RHOB	0.98658	0.699589	1.36701
RHOC	0.976247	0.924545	0.842703
RHOD	0.225145	1.16072	0.473355
RHOG	0.728465	0.698761	1.57207
RHOH	2.05939	2.61504	0.783128
RICTOR	0.997773	0.830299	1.0248
RIN1	0.701281	0.63095	1.64045
RIOK2	0.788719	1.03918	0.997681
RIPK1	0.977792	0.947478	1.08543
RIPK2	1.07362	0.600128	0.725275
RND2	1.03093	0.980484	1.11994
RND3	1.02873	0.776206	0.889396
RNF8	1.31649	1.17742	1.24168
ROCK1	0.824065	0.663531	0.968693
ROCK2	0.733095	0.669175	1.24174
ROR1	1.00304	1.11799	0.60116
ROS1	0.58566	0.926585	0.508153
RPA2	0.890604	1.05862	0.609569
RPA3	0.870506	0.913873	1.18475
RPF1	0.936381	0.879578	0.725686
RPL3	1.08148	0.963364	0.919048
RPS6	1.12472	1.11979	0.791164
RPS6KA1	1.27798	1.20114	0.826252
RPS6KA2	0.801171	0.87898	1.0512
RPS6KA3	1.07509	1.12642	0.632131
RPS6KA4	0.89113	1.52196	0.477051
RPS6KA5	1.58977	1.00588	0.680975
RPS6KA6	1.28347	1.37505	0.590404
RPS6KB1	1.23606	1.75815	0.479218
RPS6KB2	1.218	1.55474	0.624087
RPS6KC1	1.4548	1.08567	0.908691
RPTOR	1.30987	1.00907	0.621435
RRAGA	1.28614	0.979936	0.869142
RRAGB	1.44839	1.35274	0.478463
RRAGC	0.910507	1.5528	0.613367
RRAGD	1.02267	0.96218	0.858188
RRAS	0.942298	0.799261	0.722029
RRAS2	0.934834	1.26244	0.954275
RRM1	0.672114	0.775478	1.11914
RRM2	1.00282	1.37585	0.708456
RSU1	0.720466	0.49386	1.37237
RXRA	0.981485	0.590616	0.831173
RXRB	1.12869	0.800757	1.33448
RXRG	0.959347	0.661901	1.29316
RYK	0.867767	0.4131	1.4695
RYR1	0.905806	0.672171	1.00496
RYR2	1.2747	0.465272	2.33093
RYR3	1.69548	0.965953	0.908703
SAG	0.815978	0.410571	0.95282
SAR1A	0.985874	0.680519	1.51594
SAR1B	1.24936	0.538727	1.55046
SCN10A	1.06782	0.868816	1.06202
SCN11A	1.29015	0.846299	0.138328
SCN1A	1.39787	0.655414	0.869794
SCN1B	1.11527	1.16984	0.50658
SCN2A	0.890113	0.777787	1.13431
SCN3A	1.26667	0.758381	1.63808
SCN3B	1.32743	0.691984	0.996693
SCN4A	1.02431	1.87993	1.03858
SCN5A	1.48682	1.1702	1.10431
SCN7A	0.770612	0.972496	0.834355
SCN9A	1.15306	1.10926	0.978503
SCNN1A	0.965046	0.854437	0.681236
SCNN1B	0.981062	0.83117	0.840012
SCNN1D	0.939612	0.688358	1.36938
SCNN1G	0.984861	0.984861	1.09019
SEMA4G	1.14985	1.12577	1.39406
SEMA5A	1.05985	1.0924	1.07949
SESN1	1.07605	1.0051	0.843483
SESN2	1.2842	1.18519	1.25792
SFN	0.76904	0.870483	0.583589
SGK1	1.48864	0.991223	0.490459
SH2B1	0.859424	0.905975	0.439022
SH2B2	0.981387	1.04137	0.886328
SH2D2A	0.917294	0.722451	1.21476
SH3RF1	1.08894	0.951716	0.733992
SHC1	1.17658	1.33256	0.724579
SHC2	1.07282	0.793026	0.946302
SHC3	1.13239	0.926786	1.23171
SIN3A	1.14073	1.41946	0.808186
SIRPA	0.838662	0.779996	1.03464
SIRT2	0.8985	0.885687	0.987477
SKI	1.14572	0.814224	0.661752
SKIL	1.36481	0.798256	1.02622
SLC22A2	3.44925	1.16256	0.477215
SLC22A6	1.79531	1.74901	1.1108
SLC2A4	1.29906	1.60654	0.680902
SLC3A2	1.36839	1.25343	0.853306
SLC7A5	1.32379	1.34952	0.950228
SLCO1A2	1.47319	1.38538	0.488364
SLCO1B1	1.24533	1.593	0.406836
SLCO1B3	1.58326	1.24912	0.590197
SMAD1	0.722493	0.805489	0.711499
SMAD2	0.705888	0.803226	1.06285
SMAD3	0.886979	1.11559	1.0574
SMAD4	0.885448	1.7133	0.578215
SMAD5	0.714514	0.517121	0.898752
SMAD6	1.06205	0.948227	0.923057
SMAD9	1.14864	1.05371	0.706007
SMARCA1	1.5895	0.628407	0.975457
SMARCA2	1.44171	0.625333	1.7894
SMARCA4	1.3849	1.41653	1.01949
SMARCA5	0.98533	0.509276	1.69326
SMARCAD1	1.68635	1.00546	1.17311
SMARCAL1	0.919298	0.345873	1.32062
SMARCB1	0.903537	0.438814	1.25544
SMARCC1	0.942931	0.566878	1.64571
SMARCC2	1.0972	1.00407	0.905379
SMARCD1	1.25594	0.633821	1.30523
SMARCD2	0.894796	0.771502	1.40052
SMARCD3	1.16577	0.99571	0.853182
SMARCE1	1.38861	0.638646	1.08773
SMC3	1.08942	0.673738	1.26474
SMO	0.921465	0.8448	2.01768
SMPD1	0.735611	1.31272	1.56824
SMPD2	0.785819	1.13489	1.48196
SMPD3	1.0666	0.820842	0.77417
SMURF1	1.16093	3.65494	0.967723
SMURF2	1.1383	2.00133	0.595225
SNAI1	1.73705	1.50871	0.710275
SNAI2	1.06619	0.93558	1.28271
SNW1	1.04624	0.847301	1.6861
SOCS1	0.746918	0.750122	0.966322
SOCS2	1.13878	1.44272	1.05142
SOCS3	1.26643	1.22126	1.1401
SOCS4	1.11998	1.08894	0.537502
SOCS5	1.11448	1.02021	0.538009
SOS1	0.852307	0.526974	0.735915
SOS2	0.974472	0.815291	0.87042
SP1	1.27306	0.789234	0.86898
SPIRE1	0.883182	0.900032	0.405528
SPIRE2	0.937714	0.653206	1.22247
SPOCK1	0.989654	1.07527	0.811783
SPOCK2	0.883022	1.00063	0.533313
SPOCK3	1.05724	1.12797	0.522103
SPON1	1.60538	1.42118	1.12223
SPON2	0.923351	1.23375	0.798855
SPP1	0.964627	0.973394	0.784044
SRA1	1.15355	1.9404	0.613299
SRC	1.23685	0.945985	0.779643
SREBF1	0.932463	1.04946	0.632352
SREBF2	2.058	1.13248	0.608065
SRF	1.08224	1.60791	0.721019
STAM	0.980406	0.994797	0.694255
STAT1	0.912355	0.938724	1.26346
STAT2	0.60209	1.79476	1.1113
STAT3	0.946673	2.59885	0.60408
STAT4	1.36158	1.67673	0.53559
STAT5A	0.949391	0.804611	1.44323
STAT5B	0.980532	0.624102	0.630795
STAT6	0.829177	0.731708	1.09064
STK11	0.979107	1.87826	1.46985
STK36	1.63729	1.18017	0.939292
STMN4	0.893481	0.666271	0.873326
STUB1	0.78904	0.492238	0.881268
SUB1	1.92117	0.788887	1.16512
SUFU	1.29878	0.900215	1.47876
SULT2A1	1.81297	0.974341	1.19866
SUMO1	1.51865	1.2483	1.19642
SYK	1.58941	0.990886	1.75041
TAB1	0.839198	0.86819	0.792704
TAB2	0.9468	0.572584	1.10836
TAF1	1.49803	0.56802	1.25354
TAF10	0.953505	0.443078	0.939837
TAF11	1.04828	0.529823	1.24675
TAF13	0.969392	0.520589	1.12224
TAF15	0.810026	0.698382	1.1593
TAF1L	0.979036	0.92521	1.38173
TAF2	0.872695	0.617277	0.716748
TAF4	0.947284	1.13707	0.763539
TAF5	1.89128	2.27966	0.478309
TAF5L	0.814502	0.927379	0.893627
TAF6	0.767744	0.495021	1.34089
TAF6L	1.80123	1.17873	0.562002
TAF7	1.01066	0.856771	1.00716
TAF7L	0.994355	0.964939	0.414216
TAF9	1.2399	0.930385	1.43518
TAF9B	1.36829	1.09283	0.455614
TAOK2	1.44887	1.52063	1.27284
TAT	1.20943	1.02942	0.953778
TBC1D4	1.62739	1.25563	1.17688
TBK1	1.42287	0.89948	0.790727
TBP	0.708073	0.810773	0.734668
TBRG1	1.21728	1.07027	0.790957
TCEB2	1.25983	1.1273	0.957611
TCF12	1.24993	1.61637	0.568909
TCF15	1.31595	0.768792	0.781937
TCF19	0.953614	0.983932	0.710307
TCF20	0.675257	0.839021	0.927828
TCF21	1.00395	0.845461	1.01489
TCF23	1.04165	1.00658	0.779059
TCF3	1.16843	0.804272	0.634985
TCF4	0.964759	0.535969	1.13328
TCF7	1.06765	0.897779	1.15541
TCF7L1	1.3882	1.39277	0.847879
TCF7L2	1.12554	1.66075	0.559263
TCL1A	1.10131	0.95745	0.761119
TCL1B	2.05796	1.68597	0.584909
TCP1	1.02143	1.02912	0.880627
TDGF1	1.84746	1.46733	0.991093
TEAD1	1.0786	1.09016	0.77127
TEC	1.42879	1.71906	0.634607
TEK	0.895408	0.957311	0.518568
TESK1	1.1555	1.29414	0.751722
TFAM	0.717414	1.9711	0.73309
TFPI	1.24774	0.956545	0.811206
TGFA	1.51301	1.40983	1.18064
TGFB1	1.29046	1.06395	0.996762
TGFB1I1	1.09184	2.58417	1.12595
TGFB2	1.52801	0.812552	1.2053
TGFB3	1.55415	0.727656	1.44183
TGFBR1	1.3556	0.618415	1.19819
TGFBR2	2.47642	1.4895	0.962184
TGFBR3	4.659	3.05167	2.49524
THEM4	3.91623	2.19178	2.08879
THPO	1.48767	0.903383	2.04219
TIA1	0.552761	0.335034	1.76024
TIAM1	0.930286	0.428698	1.10464
TIE1	0.946477	0.992672	0.876692
TIMP1	0.751456	0.562592	1.08815
TIMP2	0.505367	0.69831	0.844479
TIMP3	0.782675	0.796049	0.349752
TIMP4	1.44816	0.48062	0.732104
TIRAP	0.575785	0.656359	1.5509
TLE1	1.03171	0.80845	1.37104
TLE2	0.859256	0.524439	1.092
TLE3	1.11202	0.780863	1.05418
TLN1	0.951838	0.645606	1.55547
TLN2	0.947609	0.992196	0.564257
TLR1	1.07218	1.47031	0.581553
TLR10	1.08824	1.15695	1.84772
TLR2	1.82338	1.00317	0.747018
TLR4	1.41251	1.70153	0.0931294
TLR5	1.2727	1.49441	0.473999
TLR6	1.11178	1.38757	0.817768
TLR7	1.17032	1.79147	0.690118
TLR8	1.10086	0.96943	1.18117
TLR9	1.20113	0.882232	1.96071
TMSB4X	0.766966	1.0244	1.08422
TMSB4Y	0.929855	2.67101	0.577017
TMX1	0.896924	0.820266	1.90125
TNC	1.13055	0.894522	0.820948
TNF	0.994974	1.40199	0.787853
TNFAIP3	1.72213	1.54876	0.467945
TNFAIP6	0.134358	1.93526	1.82593
TNFRSF10A	1.30198	1.26156	0.881346
TNFRSF10B	1.09653	0.741473	1.33165
TNFRSF10C	1.51927	1.0962	0.583597
TNFRSF10D	1.56435	1.54716	0.389678
TNFRSF11A	1.44549	1.16522	0.771751
TNFRSF12A	1.45477	1.31995	0.649552
TNFRSF13B	1.66114	1.08197	1.22408
TNFRSF13C	1.03351	0.872992	1.43874
TNFRSF14	0.975612	0.748625	1.28016
TNFRSF17	0.844297	1.325	0.978611
TNFRSF18	0.894776	1.08432	1.1459
TNFRSF1A	1.38597	1.14819	1.37788
TNFRSF1B	1.0175	0.736734	1.01158
TNFRSF21	0.996999	2.43051	1.04951
TNFRSF25	0.408661	1.43457	1.32569
TNFRSF4	0.589333	0.884915	0.973433
TNFRSF8	0.995462	1.06965	1.47691
TNFRSF9	1.0633	0.798835	2.11684
TNFSF10	3.72654	1.19752	0.756587
TNFSF11	2.73858	3.58015	2.10345
TNFSF12	0.767737	0.433249	1.39604
TNFSF13B	1.21537	0.821247	1.20416
TNFSF14	0.918558	0.935749	1.37806
TNFSF18	1.56303	1.30005	0.762667
TNFSF4	1.34395	0.999127	1.46076
TNFSF9	1.95399	1.36069	1.32734
[truncated: 196 more rows]
